# Supplementary material
Source: publisher site journal article supplement (https://www.dovepress.com/article/338242)
Supplement: Supplementary file 1 [file get_supplementary_file.php]

**Supplementary Figures**:


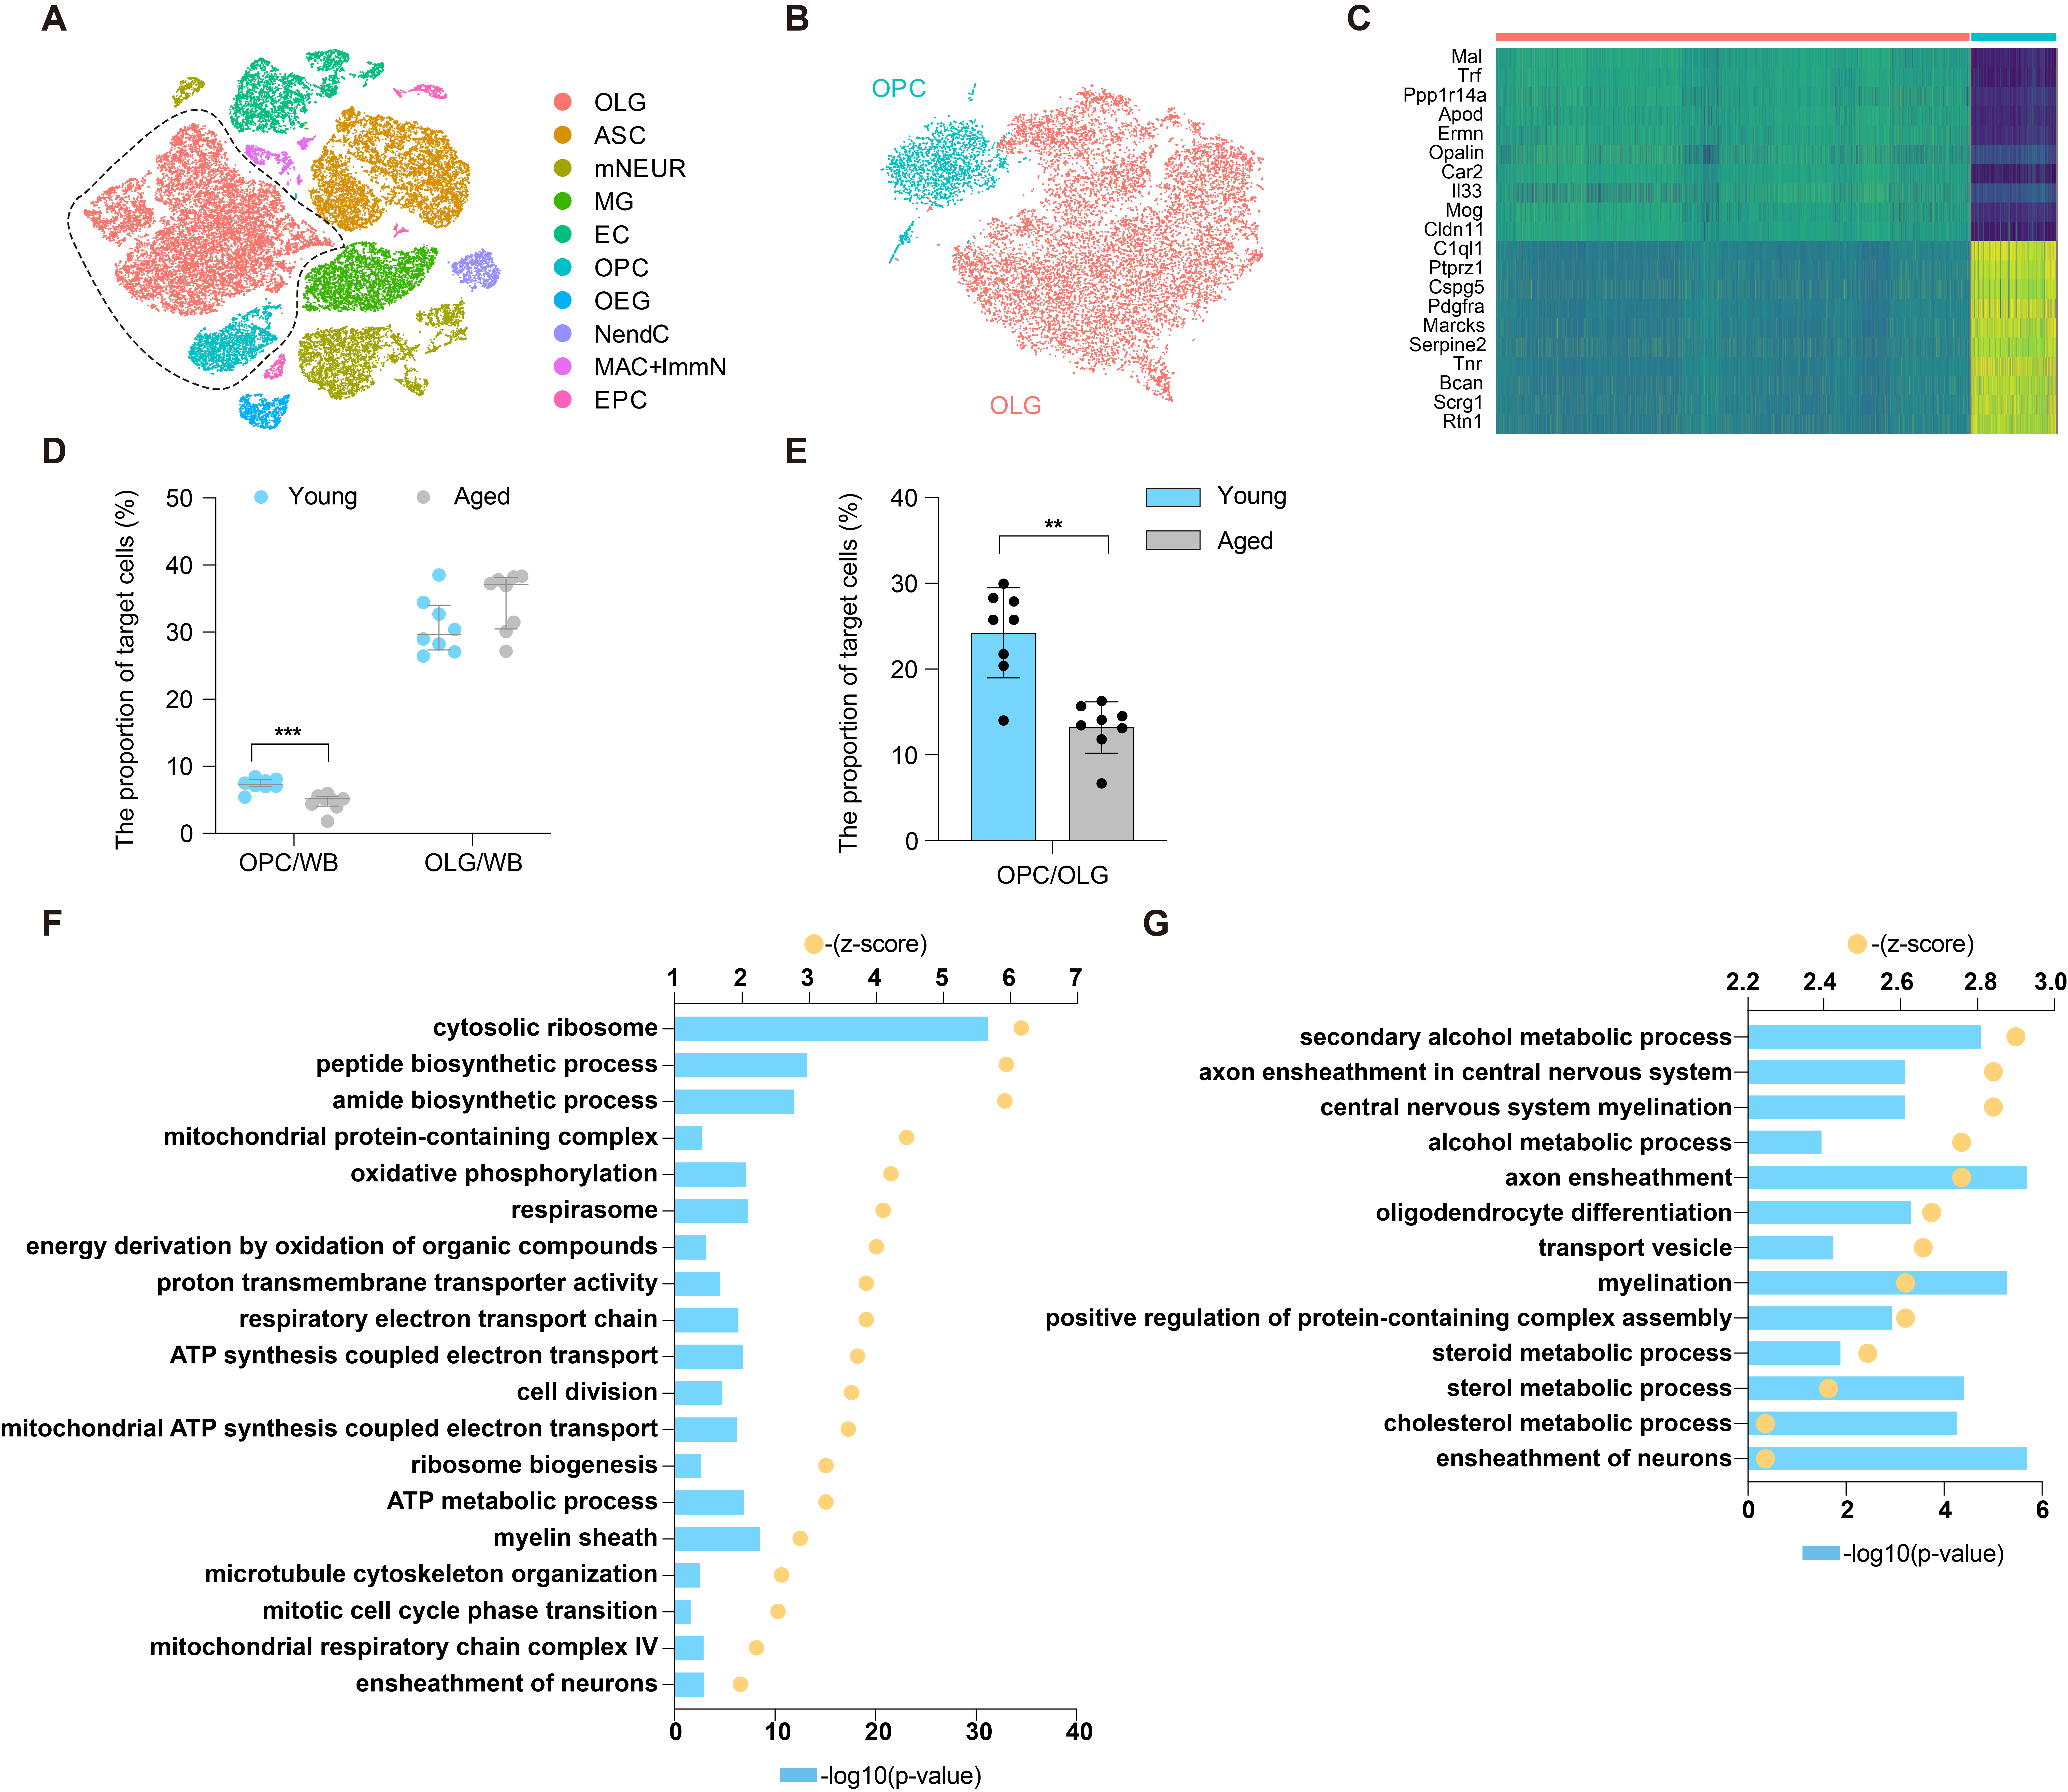


**Supplementary Figure 1** Age-associated function alterations of OPCs and OLGs **(A)** T-SNE projection of 37,069 cells (GSE129788) from whole brains of 8 young and 8 aged mice. **(B)** T-SNE projection of OPCs and OLGs extracted for downstream analysis. **(C)** Heatmap showing the expression level of top 10 marker genes in each cell type. Upregulated genes were colored in yellow and downregulated genes in blue. **(D)** The proportion of OPCs and OLGs in whole brain for young and aged mice, respectively (********* *P*-value < 0.001 by Wilcoxon Rank Sum test, n = 8 samples per condition). **(E)** Bar plot depicting the ratio of OPCs and OLGs in young and aged mice (******** *P*-value < 0.01 by Wilcoxon Rank Sum test, n = 8 samples per condition). **(F-G)** GO enrichment analysis using DEGs from aged OPCs **(F)** or OLGs **(G)** compared with young subjects. Activation status of enriched term was assessed by calculating Z-score with GOplot. Shown were GO terms predicted to be downregulated along aging (Z-score ≤ -2, adjusted *P*-value < 0.05). OPCs, oligodendrocyte progenitor cells; OLGs, oligodendrocytes; MG: microglia; EC, endothelial cells; MAC+ImmN, macrophages and immature neurons; ASC, astrocytes; EPC, ependymocytes; mNEUR, mature neurons; OEG, olfactory ensheathing glia; NendC, neuroendocrine cells.


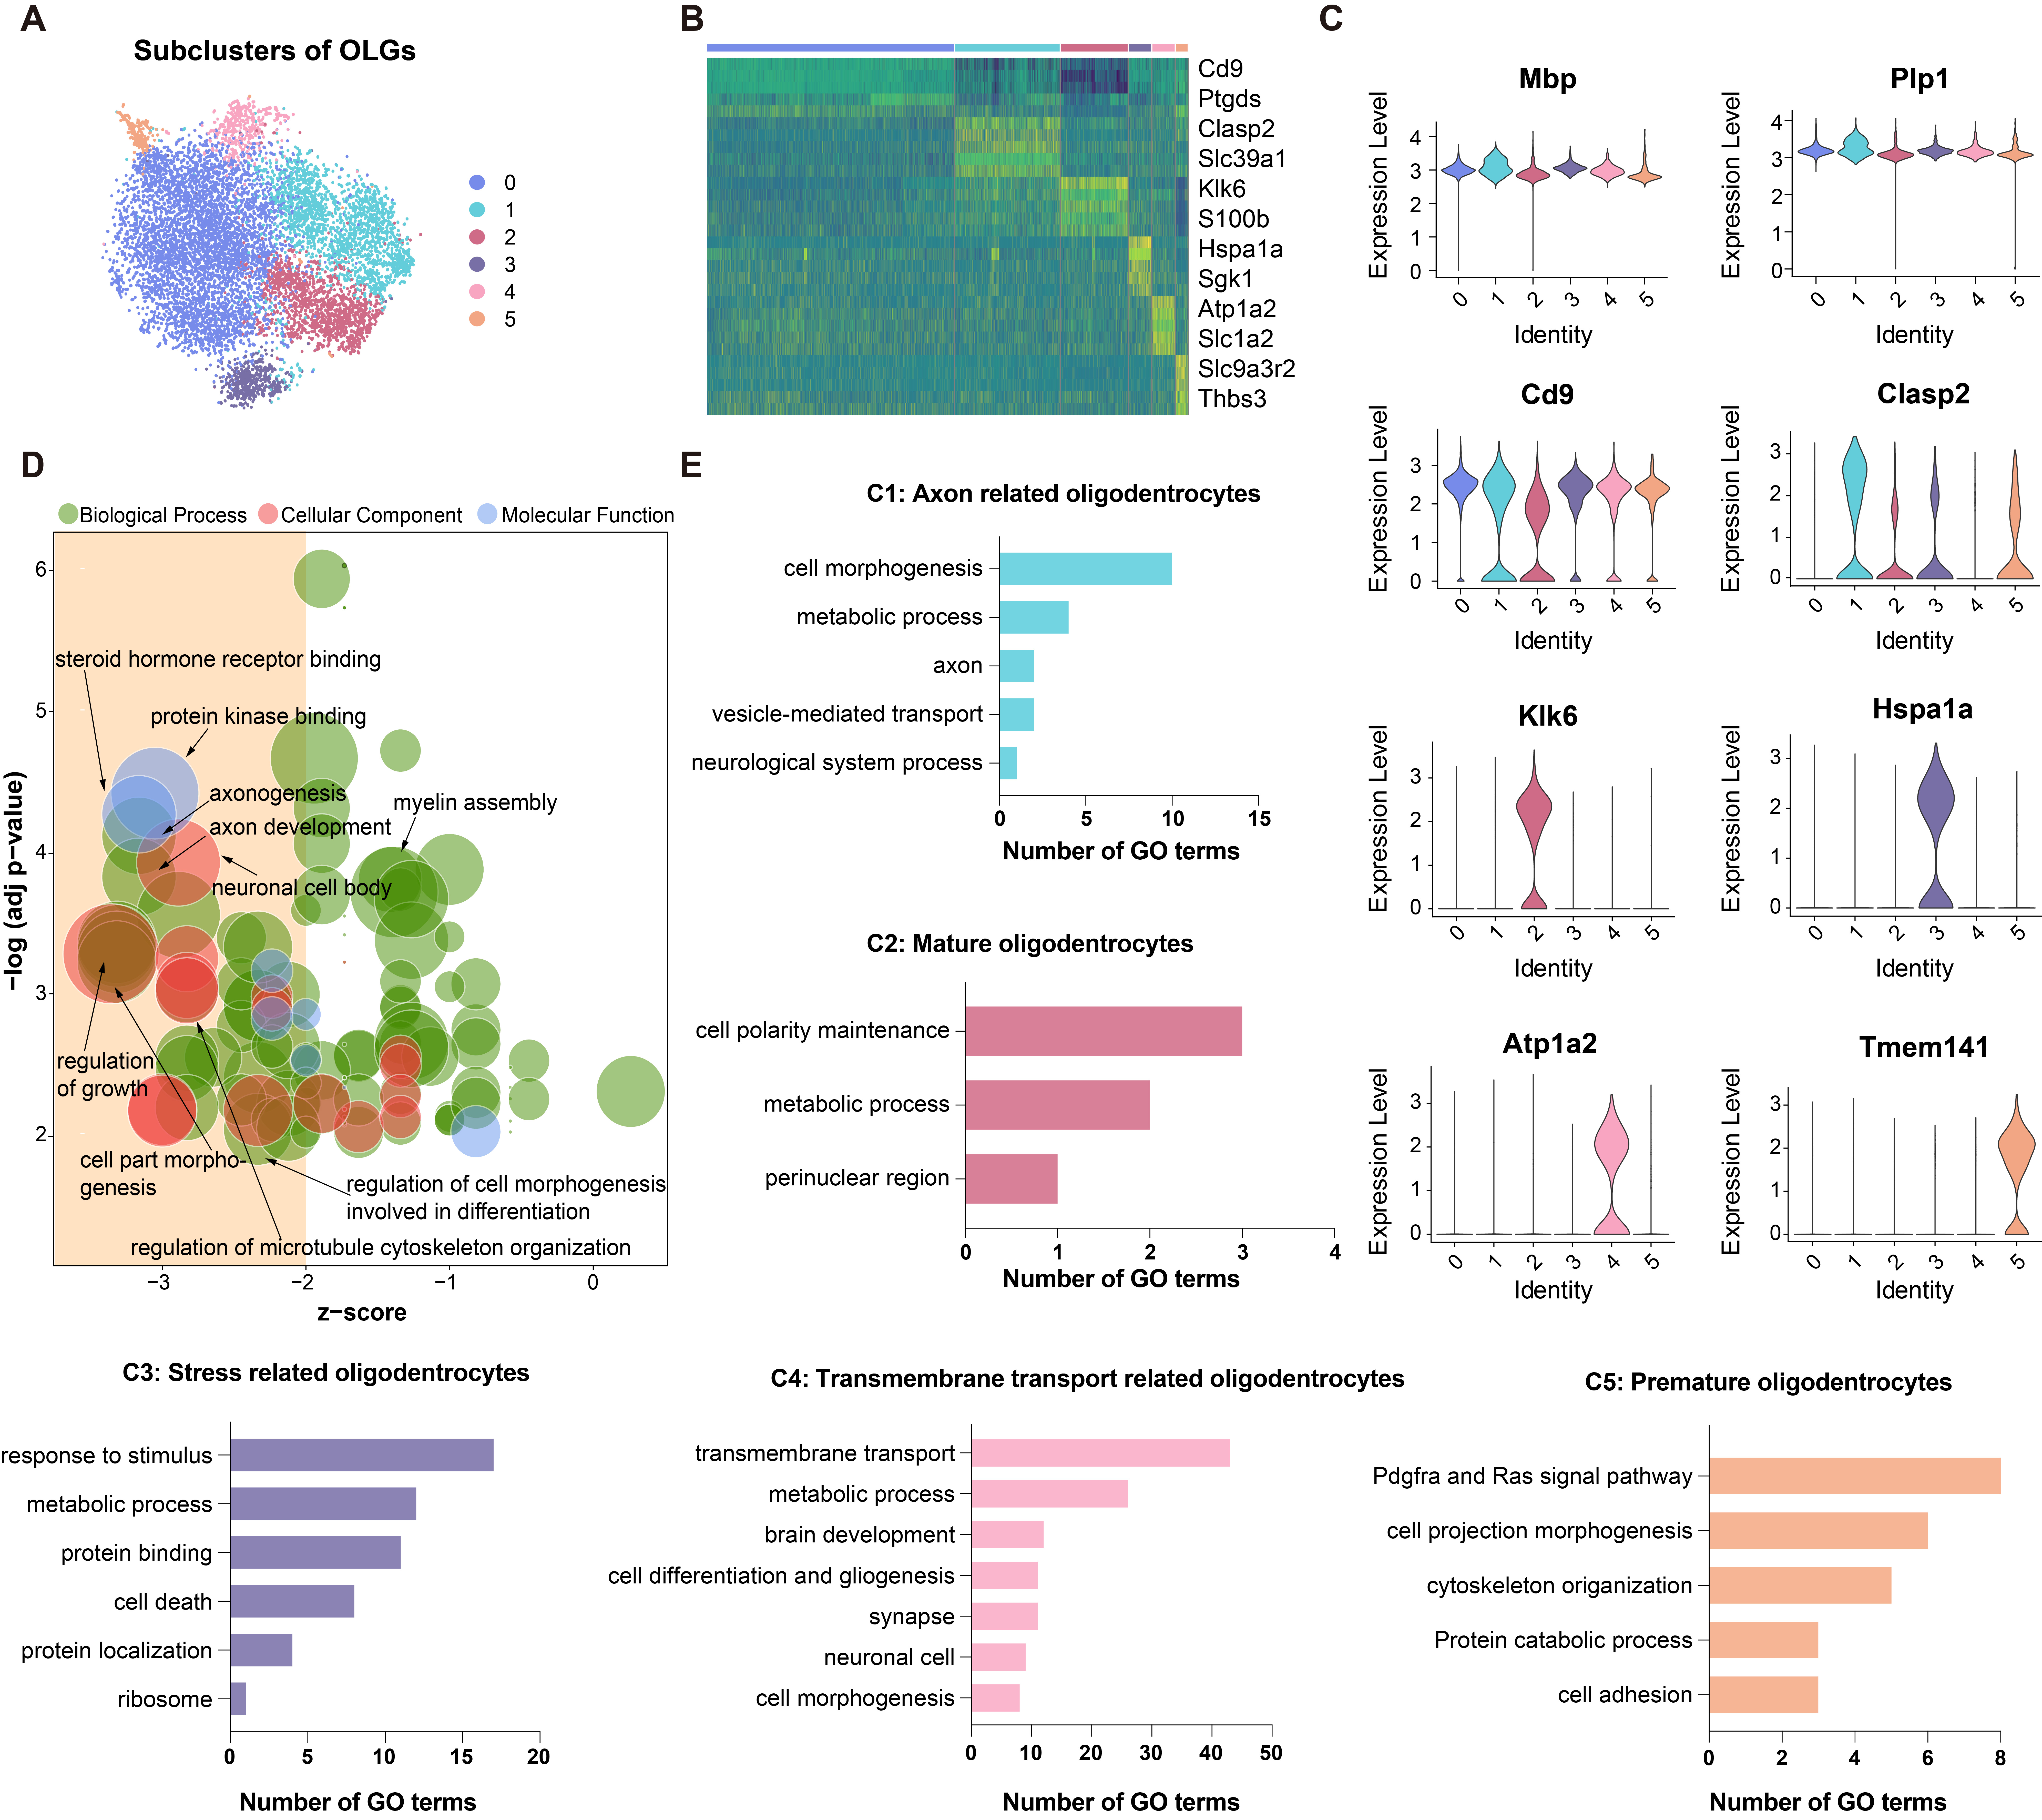


**Supplementary Figure 2** Function implications of OLGs subsets **(A)** T-SNE projection of six subclusters in all 12,360 OLGs. **(B)** Heatmap showing the expression level of top marker genes in each cell type. **(C)** Violin plots depicting marker genes for each subset of OLGs. **(D)** Bubble plot showing the results of GO enrichment analysis with DEGs between the C0 subset and all the other subclusters (adjusted *P*-value < 0.05). GO terms in biological process, cellular component and molecular function which were significantly regulated were presented and the size of bubbles reflected the number of genes in each GO term. **(E)** Five plots showing GO enrichments analysis results using DEGs from C1 to C5 vs. C0, respectively. GO terms (Z-score ≥ 2, adjusted *P*-value < 0.05) were categorized into functional clusters based on their similarities. Subsets were nominated according to their primary functional clusters.


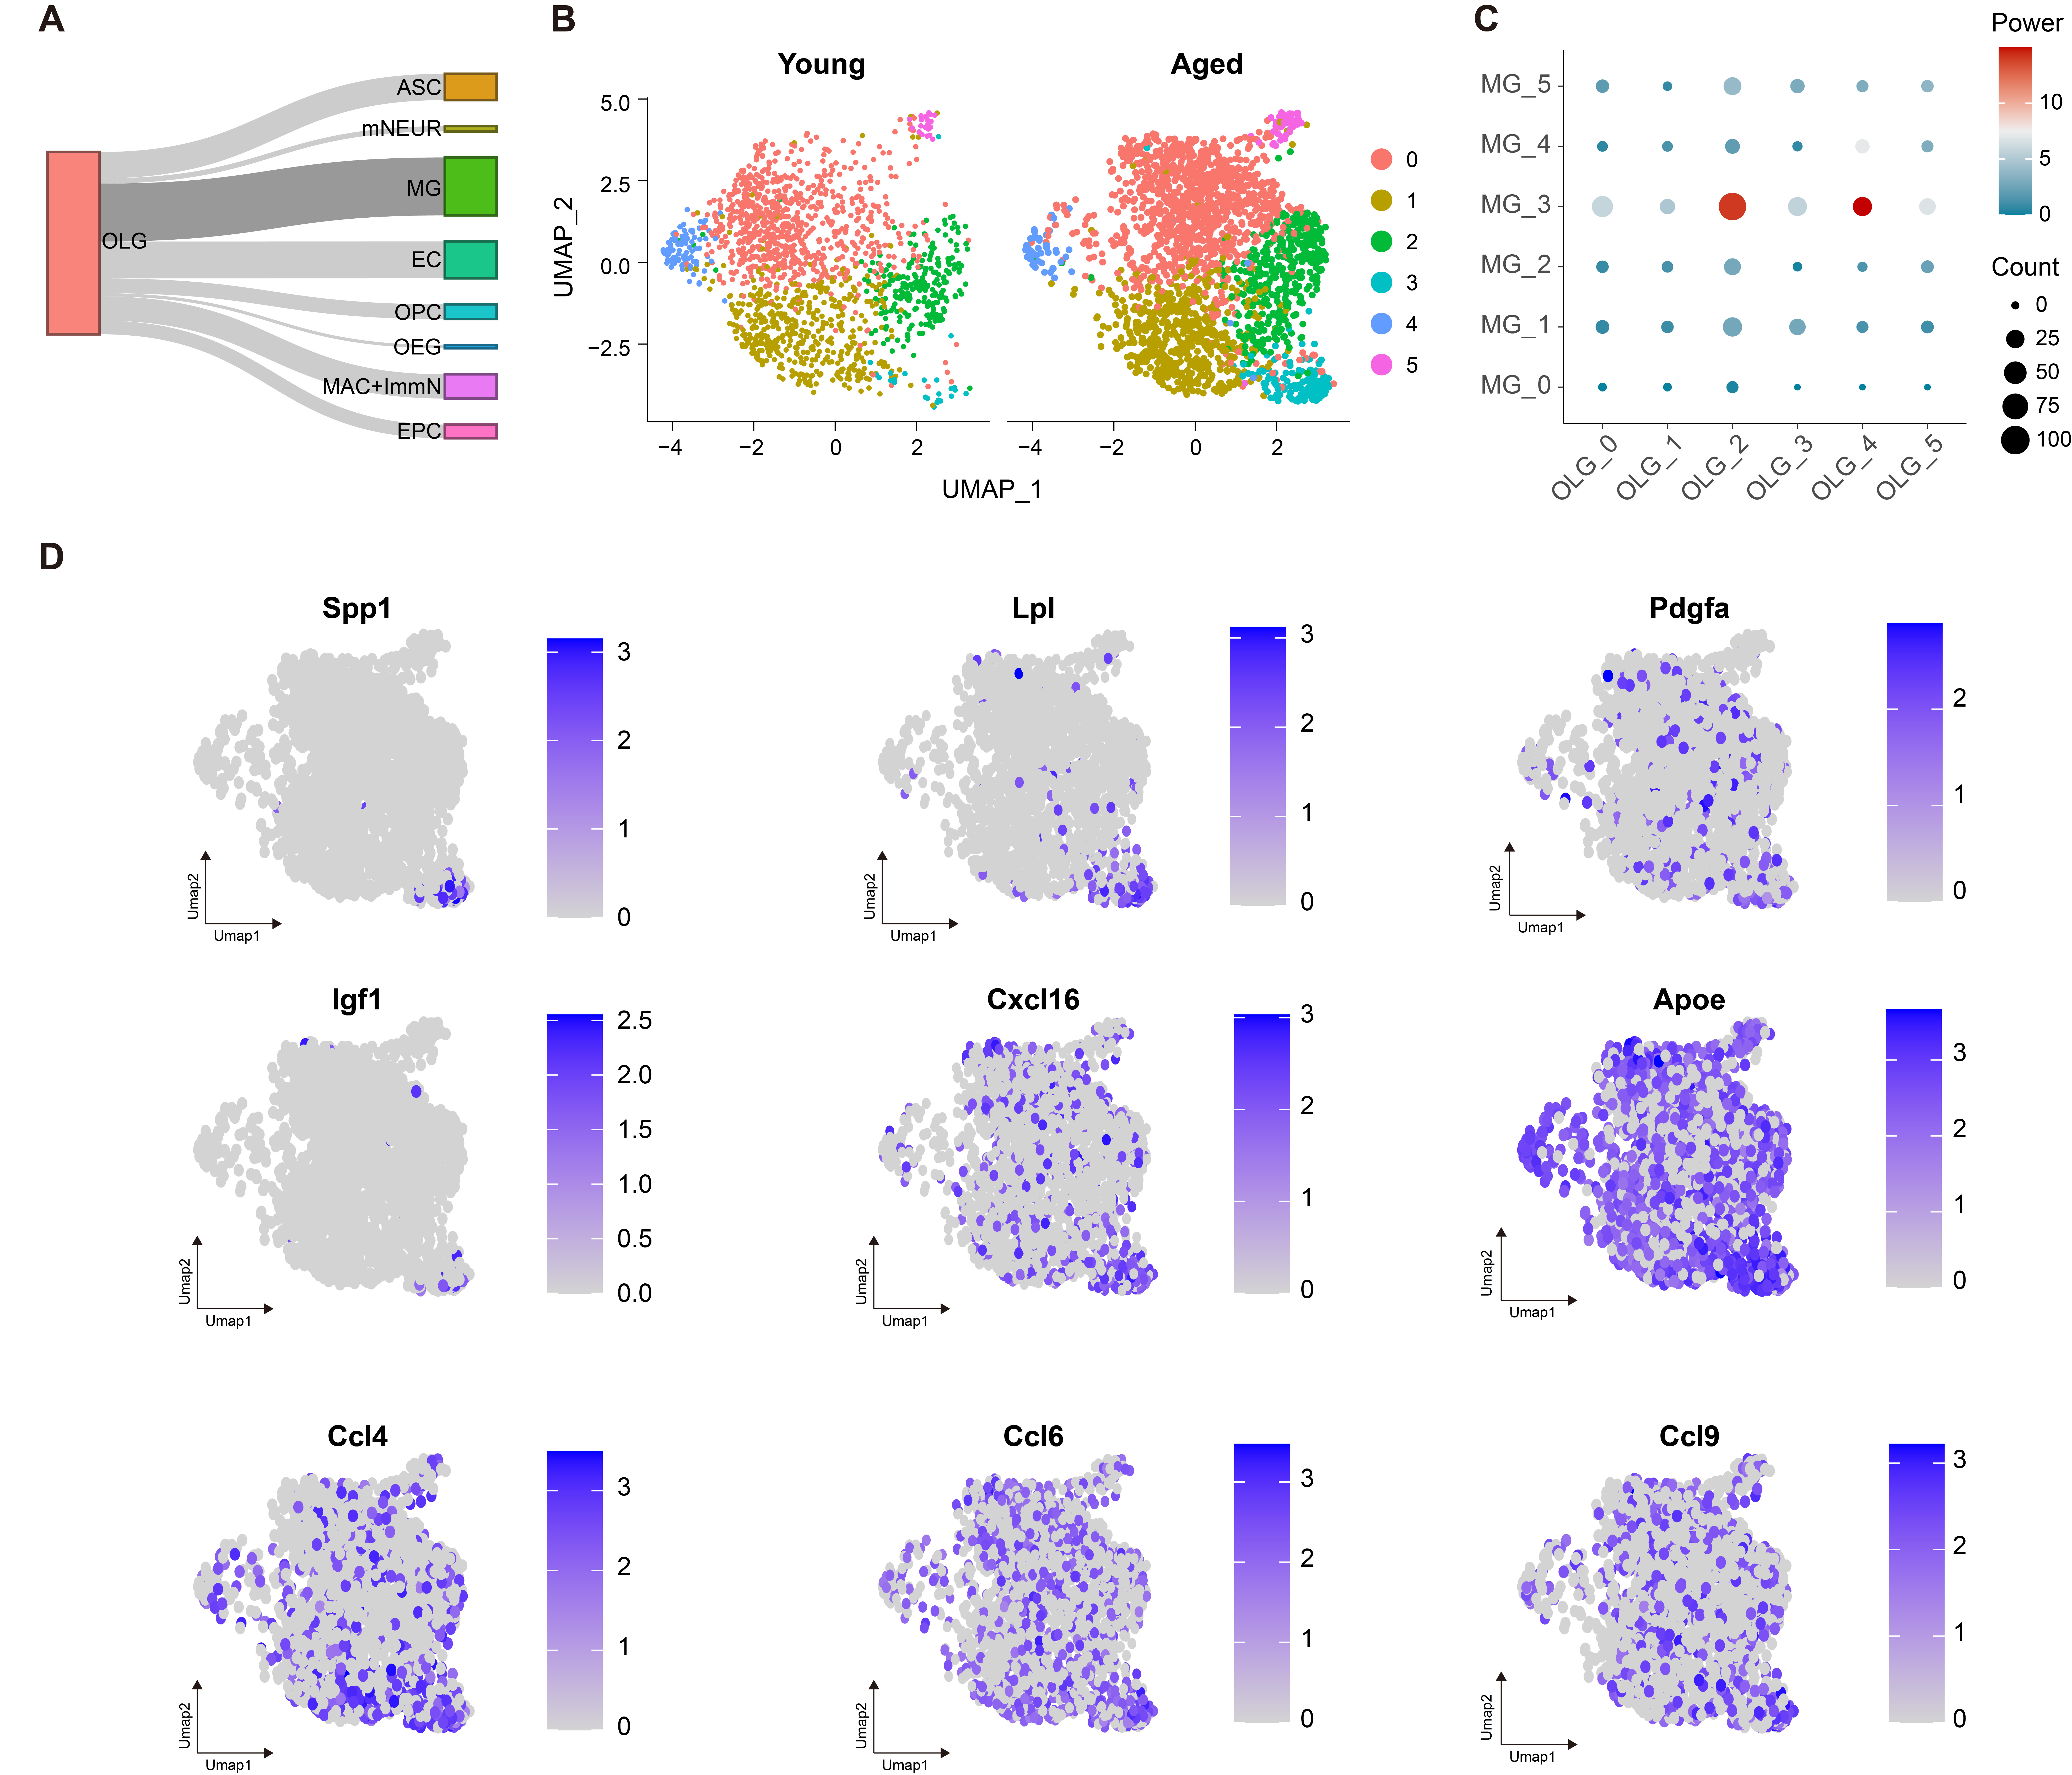


**Supplementary Figure 3** The interactions between microglia and OLGs in aging brains **(A)** Sankey diagram showing the interactions that OLGs acted on other resident cells in brain using DEGs between aged and young states of each subgroup. The proportional flow represented the number of gene pairs. **(B)** UMAP projections of six subclusters of microglia in young and aged, respectively. **(C)** Dot plot depicting the interactions that different subclusters in OLGs acted on microglia. DEGs related to *immune response* (GO: 0006955) among different subclusters were used. Node color and size represented the strength and the count of interaction pairs, respectively. **(D)** Expression profiles of cytokines released by microglia identified in Figure 3E were shown with UMAP visualization approach.


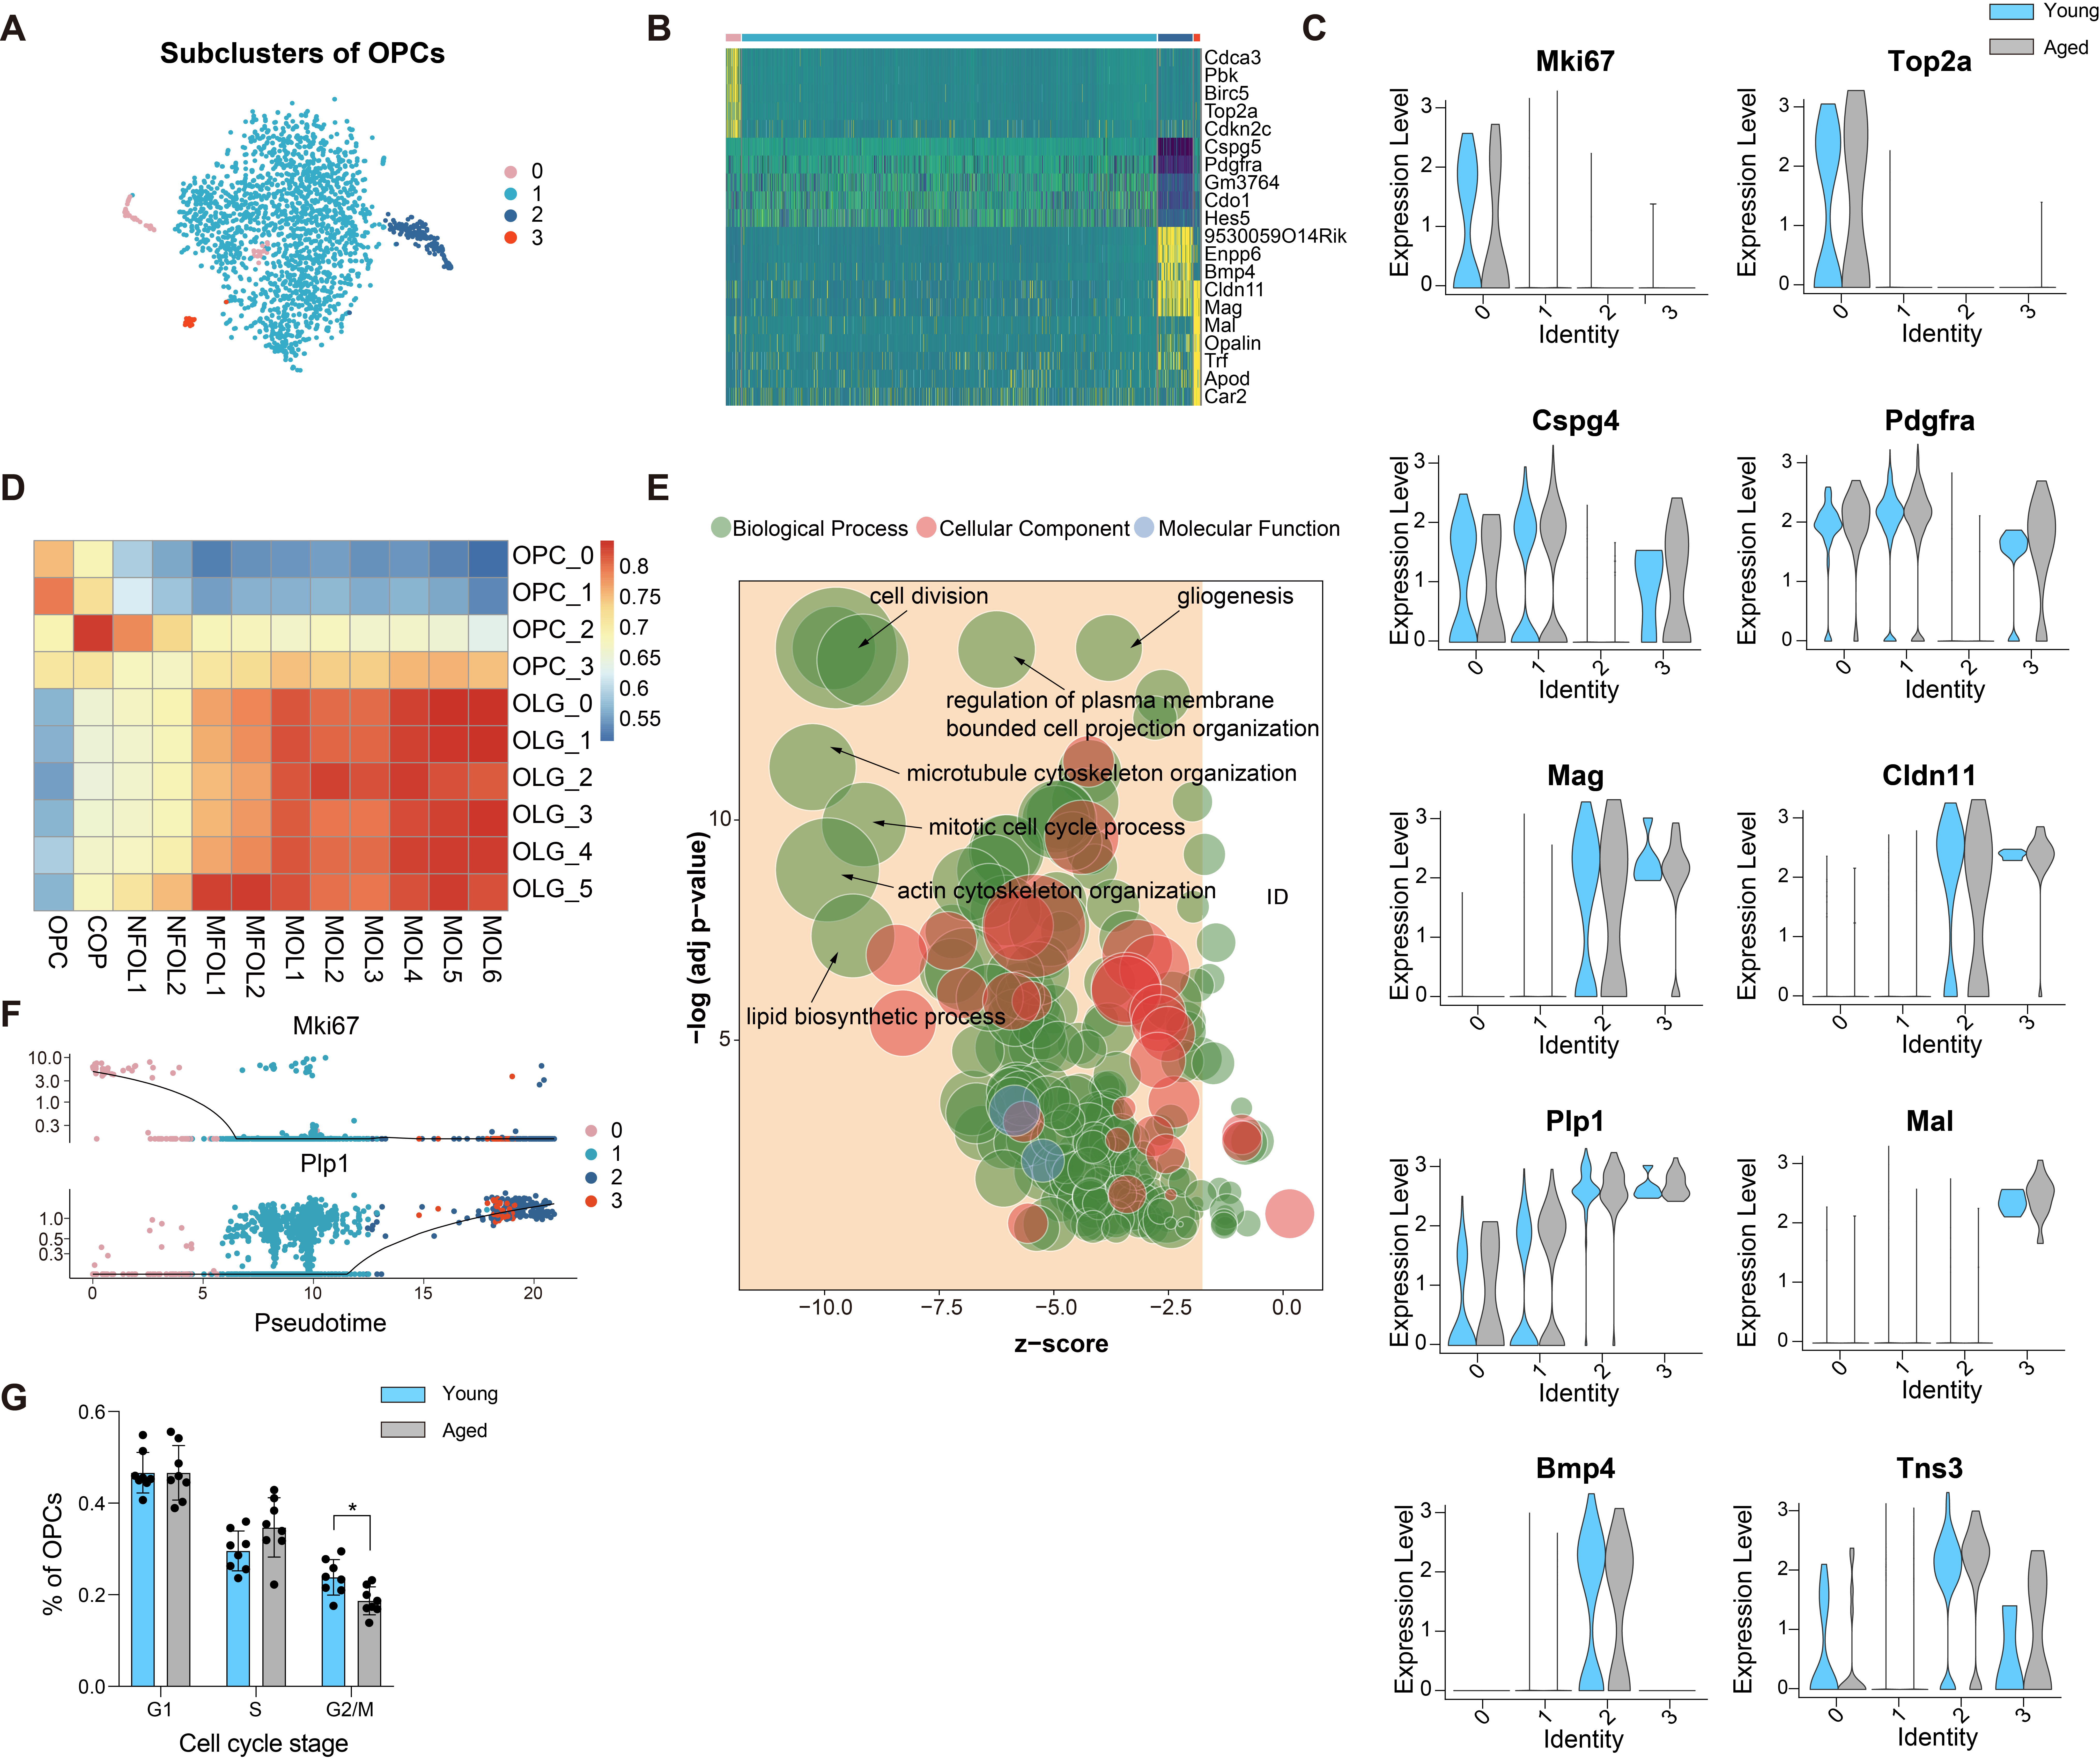


**Supplementary Figure 4** Function implications of OPCs **(A)** T-SNE projection of four subclusters in all 2,221 OPCs. **(B)** Heatmap showing the expression level of top 5 marker genes in each cell type. **(C)** Violin plots depicting marker genes for each subset. **(D)** Heatmap of pearson correlation between oligodendrocyte lineage cell subclusters with the corresponding populations mentioned by Marques S, et al. **(E)** Bubble plot showing the results of GO enrichment analysis with DEGs between the C1 subset and the other subsets (adjusted *P*-value < 0.05). GO terms in biological process, cellular component and molecular function which were significantly regulated were presented and the size of bubbles reflected the number of genes in each GO term. **(F)** Pseudo-time trajectory plots showing the expression of representative well-known division (*Mki67)* and mature (*Plp1*) OPCs related marker genes. **(G)** Bar plot depicting the percentage of OPCs in different cell cycle stages for young and aged mice (******* *P*-value < 0.05 by student's t test, n = 8 samples per condition).


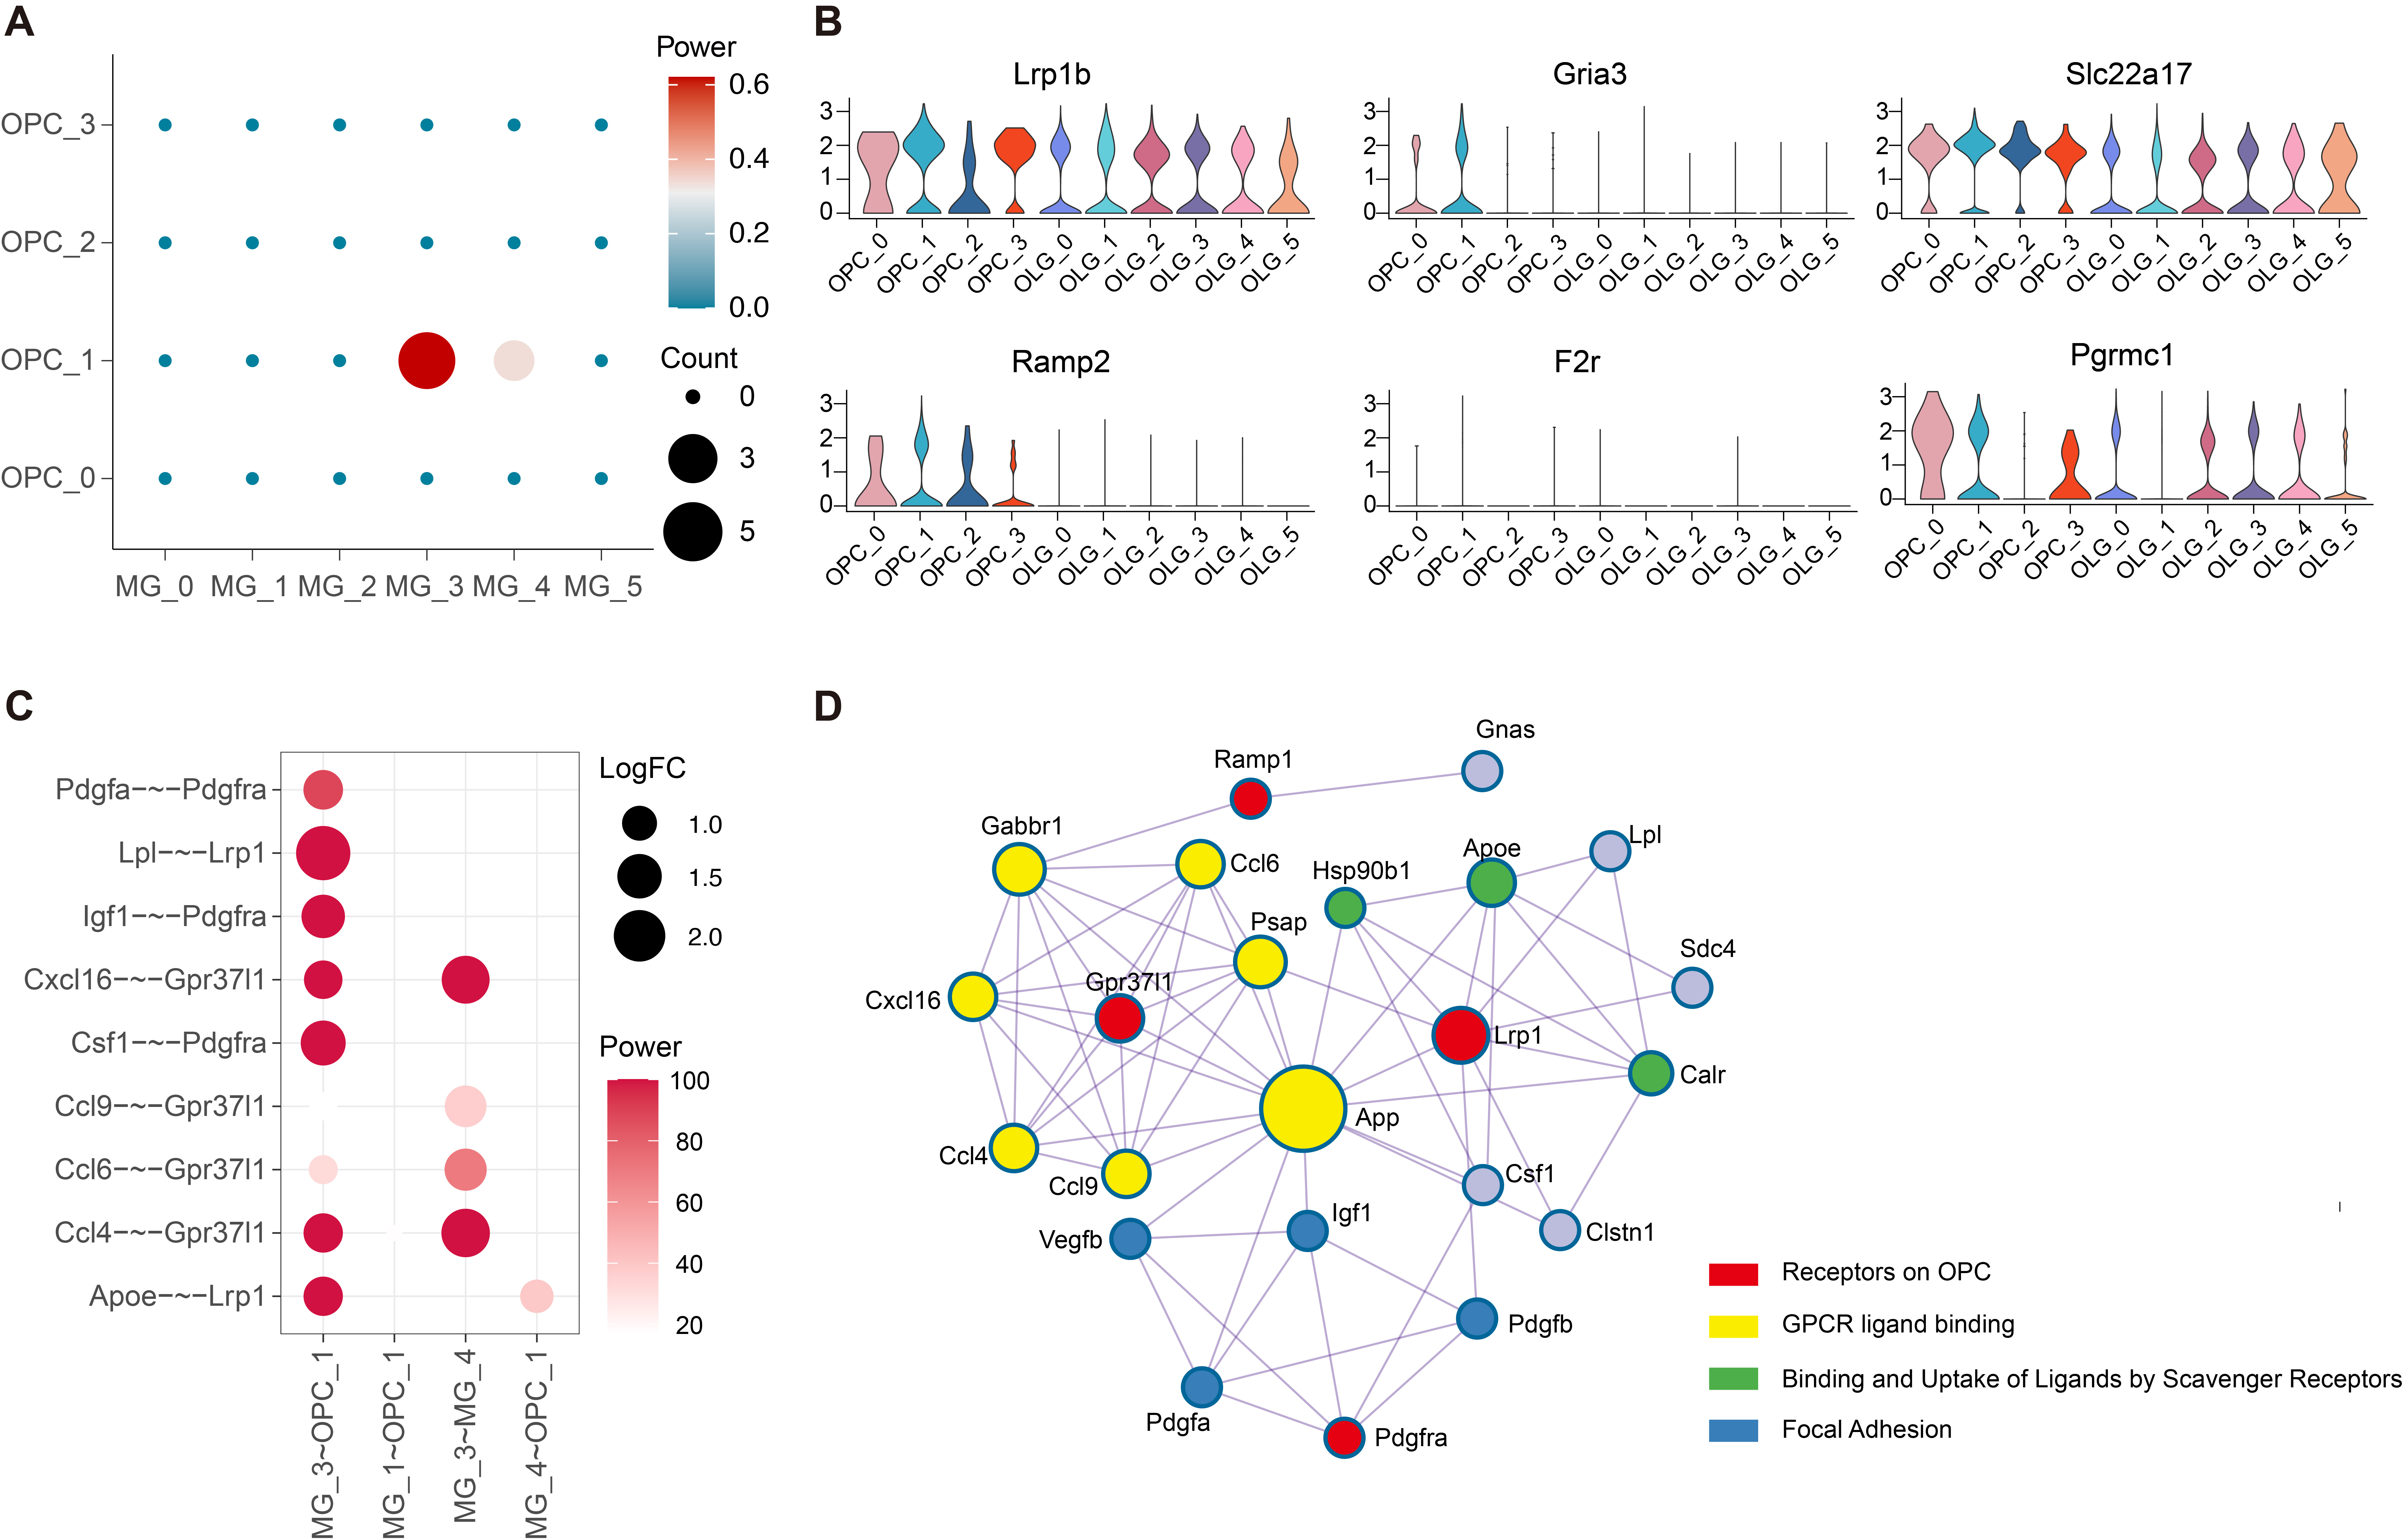


**Supplementary Figure 5** Age activated microglia released cytokines acting on OPCs **(A)** Dot plot depicting the interactions that different subclusters of microglia acted on OPCs. DEGs between aged and young mice in each subset were used. Node color and size represented the strength and the count of interaction pairs, respectively. **(B)** Violin plot showing expression of receptors upregulated along with aging in Figure 5B, except those mentioned in Figure 5C. **(C)** Dot plot depicting gene pairs between microglia and OPCs, along with all their co-occurring cell-cell interactions, using DEGs of age activated microglia (the C3 subset) and receptor genes in Figure 5C. Dot size represented the strength of gene pairs using the sum of log2 fold change of related genes and dot color meant the aggerated confidence for gene pairs. **(D)** Network plot showing the interactions between extracellular ligands from microglia C3 and receptors in Figure 5C, colored by function clusters derived from Metascape.

# Supplementary Table 1. GO enrichment results of DEGs between aged and young mice for OPCs and OLGs

| **ID** | **term** | **Zscore** | **adj_pval** | **log10_p_val** | **cell** |
| --- | --- | --- | --- | --- | --- |
| GO:0097060 | synaptic membrane | 3.65655170 | 0.00547118 | 2.26191919 | OPCs |
| GO:0045211 | postsynaptic membrane | 3.44123601 | 0.04370067 | 1.35951188 | OPCs |
| GO:0098936 | intrinsic component of postsynaptic membrane | 3.05085108 | 0.03856048 | 1.41385761 | OPCs |
| GO:0010977 | negative regulation of neuron projection development | 2.32379001 | 0.0022261 | 2.65245599 | OPCs |
| GO:0007272 | ensheathment of neurons | -2 | 0.00114821 | 2.93998023 | OPCs |
| GO:0008366 | axon ensheathment | -2 | 0.00114821 | 2.93998023 | OPCs |
| GO:0005751 | mitochondrial respiratory chain complex IV | -2.236068 | 0.00121315 | 2.91608662 | OPCs |
| GO:0005844 | polysome | -2.32379 | 2.20E-07 | 6.6567195 | OPCs |
| GO:0042255 | ribosome assembly | -2.3533936 | 1.39E-05 | 4.85638381 | OPCs |
| GO:0022613 | ribonucleoprotein complex biogenesis | -2.3533936 | 0.00157237 | 2.80344457 | OPCs |
| GO:0005874 | microtubule | -2.4019223 | 0.00252106 | 2.59841644 | OPCs |
| GO:0044770 | cell cycle phase transition | -2.4494897 | 0.01558487 | 1.80729675 | OPCs |
| GO:0007051 | spindle organization | -2.4961509 | 0.04509078 | 1.34591223 | OPCs |
| GO:0044772 | mitotic cell cycle phase transition | -2.5584086 | 0.02106116 | 1.67651765 | OPCs |
| GO:0000226 | microtubule cytoskeleton organization | -2.6111648 | 0.00278039 | 2.55589412 | OPCs |
| GO:0006123 | mitochondrial electron transport, cytochrome c to oxygen | -2.6457513 | 1.46E-06 | 5.83699794 | OPCs |
| GO:0019646 | aerobic electron transport chain | -2.6457513 | 1.46E-06 | 5.83699794 | OPCs |
| GO:0000028 | ribosomal small subunit assembly | -2.6457513 | 0.00010953 | 3.96047347 | OPCs |
| GO:0007346 | regulation of mitotic cell cycle | -2.8867513 | 0.00312395 | 2.50529605 | OPCs |
| GO:0043209 | myelin sheath | -2.8867513 | 3.05E-09 | 8.51590068 | OPCs |
| GO:0045277 | respiratory chain complex IV | -3 | 2.26E-07 | 6.64548943 | OPCs |
| GO:0019843 | rRNA binding | -3 | 1.77E-08 | 7.75109671 | OPCs |
| GO:1903047 | mitotic cell cycle process | -3.1513544 | 0.00043595 | 3.36056544 | OPCs |
| GO:0009060 | aerobic respiration | -3.1622777 | 0.00278039 | 2.55589412 | OPCs |
| GO:0070069 | cytochrome complex | -3.1622777 | 8.50E-07 | 6.07073545 | OPCs |
| GO:0015002 | heme-copper terminal oxidase activity | -3.1622777 | 3.50E-08 | 7.45594885 | OPCs |
| GO:0016676 | oxidoreductase activity, acting on a heme group of donors, oxygen as acceptor | -3.1622777 | 3.50E-08 | 7.45594885 | OPCs |
| GO:0016675 | oxidoreductase activity, acting on a heme group of donors | -3.1622777 | 5.07E-08 | 7.29480561 | OPCs |
| GO:0046034 | ATP metabolic process | -3.2716515 | 1.13E-07 | 6.94680678 | OPCs |
| GO:0042254 | ribosome biogenesis | -3.2732684 | 0.00213669 | 2.67025845 | OPCs |
| GO:0022625 | cytosolic large ribosomal subunit | -3.2998316 | 1.43E-11 | 10.8447183 | OPCs |
| GO:0015934 | large ribosomal subunit | -3.2998316 | 6.75E-07 | 6.17064063 | OPCs |
| GO:0002181 | cytoplasmic translation | -3.441236 | 9.78E-10 | 9.00968358 | OPCs |
| GO:0042274 | ribosomal small subunit biogenesis | -3.4641016 | 5.12E-05 | 4.2905423 | OPCs |
| GO:0005746 | mitochondrial respirasome | -3.4641016 | 0.00010953 | 3.96047347 | OPCs |
| GO:0042775 | mitochondrial ATP synthesis coupled electron transport | -3.6055513 | 5.52E-07 | 6.25790638 | OPCs |
| GO:0051301 | cell division | -3.6536566 | 1.65E-05 | 4.78338313 | OPCs |
| GO:0042773 | ATP synthesis coupled electron transport | -3.7416574 | 1.42E-07 | 6.84736071 | OPCs |
| GO:0009055 | electron transfer activity | -3.7416574 | 9.35E-06 | 5.02914997 | OPCs |
| GO:0004129 | cytochrome-c oxidase activity | -3.8623579 | 3.50E-08 | 7.45594885 | OPCs |
| GO:0022904 | respiratory electron transport chain | -3.8729833 | 4.31E-07 | 6.36552698 | OPCs |
| GO:0022900 | electron transport chain | -3.8729833 | 7.34E-07 | 6.13438592 | OPCs |
| GO:0098803 | respiratory chain complex | -3.8729833 | 5.71E-07 | 6.24374214 | OPCs |
| GO:0015078 | proton transmembrane transporter activity | -3.8729833 | 3.01E-05 | 4.521392 | OPCs |
| GO:0098800 | inner mitochondrial membrane protein complex | -4 | 3.62E-05 | 4.44112934 | OPCs |
| GO:0015980 | energy derivation by oxidation of organic compounds | -4.0249224 | 0.00070783 | 3.15007148 | OPCs |
| GO:0045333 | cellular respiration | -4.1231056 | 9.05E-05 | 4.04329331 | OPCs |
| GO:0070469 | respirasome | -4.1231056 | 5.07E-08 | 7.29480561 | OPCs |
| GO:0022627 | cytosolic small ribosomal subunit | -4.1461399 | 1.00E-18 | 18 | OPCs |
| GO:0006091 | generation of precursor metabolites and energy | -4.1576092 | 0.00016874 | 3.77279034 | OPCs |
| GO:0006119 | oxidative phosphorylation | -4.2426407 | 7.59E-08 | 7.11980502 | OPCs |
| GO:0015935 | small ribosomal subunit | -4.3788027 | 1.17E-15 | 14.9336741 | OPCs |
| GO:0019866 | organelle inner membrane | -4.4387727 | 6.08E-07 | 6.21624959 | OPCs |
| GO:0098798 | mitochondrial protein-containing complex | -4.472136 | 0.00164558 | 2.78368162 | OPCs |
| GO:0031966 | mitochondrial membrane | -4.9193496 | 7.59E-08 | 7.11980502 | OPCs |
| GO:0005740 | mitochondrial envelope | -5.1052747 | 8.25E-08 | 7.08372867 | OPCs |
| GO:0005743 | mitochondrial inner membrane | -5.1449576 | 1.82E-06 | 5.73890167 | OPCs |
| GO:0005840 | ribosome | -5.4272042 | 6.51E-23 | 22.1862146 | OPCs |
| GO:0044391 | ribosomal subunit | -5.4660817 | 7.64E-23 | 22.1166601 | OPCs |
| GO:0003735 | structural constituent of ribosome | -5.5549206 | 6.43E-28 | 27.1915185 | OPCs |
| GO:0005198 | structural molecule activity | -5.7616596 | 1.00E-18 | 18 | OPCs |
| GO:0043604 | amide biosynthetic process | -5.9385745 | 1.19E-12 | 11.9232263 | OPCs |
| GO:0006412 | translation | -5.9603956 | 1.25E-14 | 13.9036115 | OPCs |
| GO:0043043 | peptide biosynthetic process | -5.9603956 | 6.24E-14 | 13.2049337 | OPCs |
| GO:0022626 | cytosolic ribosome | -6.182518 | 6.94E-32 | 31.1584922 | OPCs |
| GO:0005840 | ribosome | 6.56532164 | 6.14E-27 | 26.2121209 | OLGs |
| GO:0044391 | ribosomal subunit | 6.33747871 | 8.72E-28 | 27.0595449 | OLGs |
| GO:0003735 | structural constituent of ribosome | 6.27219463 | 4.45E-25 | 24.3514919 | OLGs |
| GO:0006412 | translation | 5.58156306 | 6.16E-10 | 9.21056001 | OLGs |
| GO:0043043 | peptide biosynthetic process | 5.497625 | 3.98E-10 | 9.39963305 | OLGs |
| GO:0022627 | cytosolic small ribosomal subunit | 5.30791042 | 1.42E-13 | 12.8472134 | OLGs |
| GO:0022625 | cytosolic large ribosomal subunit | 5.1120772 | 5.25E-22 | 21.2801941 | OLGs |
| GO:0005198 | structural molecule activity | 4.94974747 | 3.45E-15 | 14.4628108 | OLGs |
| GO:0015934 | large ribosomal subunit | 4.90189468 | 2.60E-17 | 16.5850267 | OLGs |
| GO:0008380 | RNA splicing | 4.71939904 | 2.50E-07 | 6.6016892 | OLGs |
| GO:0022613 | ribonucleoprotein complex biogenesis | 4.66666667 | 0.00076706 | 3.11516868 | OLGs |
| GO:0016071 | mRNA metabolic process | 4.5254834 | 0.00091876 | 3.03679703 | OLGs |
| GO:0006397 | mRNA processing | 4.42245854 | 4.64E-05 | 4.33317018 | OLGs |
| GO:0022626 | cytosolic ribosome | 4.3827726 | 2.64E-36 | 35.5785058 | OLGs |
| GO:0042254 | ribosome biogenesis | 4.31455497 | 0.00906994 | 2.04239569 | OLGs |
| GO:0043604 | amide biosynthetic process | 4.30265273 | 7.81E-12 | 11.1070812 | OLGs |
| GO:0015935 | small ribosomal subunit | 4.26401433 | 2.18E-10 | 9.66233284 | OLGs |
| GO:0019843 | rRNA binding | 4.24264069 | 1.63E-07 | 6.78861226 | OLGs |
| GO:0005844 | polysome | 4.02492236 | 7.45E-09 | 8.12781581 | OLGs |
| GO:0006364 | rRNA processing | 3.90006748 | 0.03512859 | 1.45433931 | OLGs |
| GO:0042274 | ribosomal small subunit biogenesis | 3.60555128 | 0.00076706 | 3.11516868 | OLGs |
| GO:0022618 | ribonucleoprotein complex assembly | 3.57770876 | 0.00172274 | 2.76377989 | OLGs |
| GO:0071826 | ribonucleoprotein complex subunit organization | 3.57770876 | 0.00286021 | 2.5436015 | OLGs |
| GO:0042788 | polysomal ribosome | 3.46410162 | 5.54E-07 | 6.25680813 | OLGs |
| GO:0002181 | cytoplasmic translation | 3.41121146 | 6.00E-09 | 8.22217163 | OLGs |
| GO:0000375 | RNA splicing, via transesterification reactions | 3.40168026 | 0.00076706 | 3.11516868 | OLGs |
| GO:0000377 | RNA splicing, via transesterification reactions with bulged adenosine as nucleophile | 3.40168026 | 0.00076706 | 3.11516868 | OLGs |
| GO:0000398 | mRNA splicing, via spliceosome | 3.40168026 | 0.00076706 | 3.11516868 | OLGs |
| GO:0042255 | ribosome assembly | 3.16227766 | 0.01565044 | 1.8054734 | OLGs |
| GO:0031344 | regulation of cell projection organization | 3.10086836 | 8.89E-07 | 6.05112619 | OLGs |
| GO:0010975 | regulation of neuron projection development | 3 | 2.40E-05 | 4.61905835 | OLGs |
| GO:0043484 | regulation of RNA splicing | 3 | 6.54E-07 | 6.18461722 | OLGs |
| GO:1903311 | regulation of mRNA metabolic process | 2.98481003 | 0.03730729 | 1.42820629 | OLGs |
| GO:0120035 | regulation of plasma membrane bounded cell projection organization | 2.89772763 | 2.00E-06 | 5.69899988 | OLGs |
| GO:0050807 | regulation of synapse organization | 2.71068738 | 0.01986814 | 1.70184282 | OLGs |
| GO:0050803 | regulation of synapse structure or activity | 2.71068738 | 0.03370067 | 1.47236151 | OLGs |
| GO:0050684 | regulation of mRNA processing | 2.68328157 | 0.00024466 | 3.61143138 | OLGs |
| GO:0000028 | ribosomal small subunit assembly | 2.44948974 | 0.0111823 | 1.95146883 | OLGs |
| GO:0050821 | protein stabilization | 2.44948974 | 4.64E-05 | 4.33317018 | OLGs |
| GO:0070180 | large ribosomal subunit rRNA binding | 2.44948974 | 3.15E-05 | 4.50162454 | OLGs |
| GO:0044389 | ubiquitin-like protein ligase binding | 2.40098019 | 4.64E-05 | 4.33317018 | OLGs |
| GO:0010977 | negative regulation of neuron projection development | 2.40039679 | 0.00035876 | 3.44519052 | OLGs |
| GO:0048024 | regulation of mRNA splicing, via spliceosome | 2.3570226 | 5.13E-05 | 4.28982964 | OLGs |
| GO:0031345 | negative regulation of cell projection organization | 2.29365855 | 0.00116557 | 2.93346162 | OLGs |
| GO:0031625 | ubiquitin protein ligase binding | 2.26300953 | 3.97E-05 | 4.40098107 | OLGs |
| GO:0072594 | establishment of protein localization to organelle | 2.19740106 | 0.00459091 | 2.33810119 | OLGs |
| GO:0048667 | cell morphogenesis involved in neuron differentiation | 2.10090293 | 2.00E-06 | 5.69899988 | OLGs |
| GO:0031647 | regulation of protein stability | 2.02259959 | 5.59E-06 | 5.25264414 | OLGs |
| GO:0014069 | postsynaptic density | 2.02072594 | 4.97E-09 | 8.30360412 | OLGs |
| GO:0032279 | asymmetric synapse | 2.02072594 | 6.93E-09 | 8.15913527 | OLGs |
| GO:0048812 | neuron projection morphogenesis | 2 | 1.81E-07 | 6.74163105 | OLGs |
| GO:0007272 | ensheathment of neurons | -2.236068 | 2.00E-06 | 5.69899988 | OLGs |
| GO:0008203 | cholesterol metabolic process | -2.236068 | 5.37E-05 | 4.27016178 | OLGs |
| GO:0016125 | sterol metabolic process | -2.4003968 | 3.97E-05 | 4.40098107 | OLGs |
| GO:0008202 | steroid metabolic process | -2.5018512 | 0.01292657 | 1.88851669 | OLGs |
| GO:0031334 | positive regulation of protein-containing complex assembly | -2.6 | 0.00116557 | 2.93346162 | OLGs |
| GO:0042552 | myelination | -2.6 | 5.21E-06 | 5.28291582 | OLGs |
| GO:0030133 | transport vesicle | -2.6457513 | 0.01824932 | 1.73875331 | OLGs |
| GO:0048709 | oligodendrocyte differentiation | -2.6678919 | 0.0004654 | 3.33217338 | OLGs |
| GO:0008366 | axon ensheathment | -2.7456259 | 2.00E-06 | 5.69899988 | OLGs |
| GO:0006066 | alcohol metabolic process | -2.7456259 | 0.03150177 | 1.50166505 | OLGs |
| GO:0022010 | central nervous system myelination | -2.8284271 | 0.00061984 | 3.20772062 | OLGs |
| GO:0032291 | axon ensheathment in central nervous system | -2.8284271 | 0.00061984 | 3.20772062 | OLGs |
| GO:1902652 | secondary alcohol metabolic process | -2.8867513 | 1.77E-05 | 4.75321527 | OLGs |

OPCs, oligodendrocyte progenitor cells; OLGs, oligodendrocytes, DEGs, differentially expressed genes.

# Supplementary Table 2. Detailed functional enrichment results for 5 subclusters (the C1 to C5 subset) of OLGs

| **ID** | **term** | **Zscore** | **category** | **function cluster** | **subset** |
| --- | --- | --- | --- | --- | --- |
| GO:0033267 | axon part | 2.44948974 | CC | axon | C1 |
| GO:0150034 | distal axon | 2.23606798 | CC | axon | C1 |
| GO:0048812 | neuron projection morphogenesis | 2.64575131 | BP | Cell morphogenesis | C1 |
| GO:0120039 | plasma membrane bounded cell projection morphogenesis | 2.64575131 | BP | Cell morphogenesis | C1 |
| GO:0007409 | axonogenesis | 2.44948974 | BP | Cell morphogenesis | C1 |
| GO:0061564 | axon development | 2.44948974 | BP | Cell morphogenesis | C1 |
| GO:0022604 | regulation of cell morphogenesis | 2.44948974 | BP | Cell morphogenesis | C1 |
| GO:1990138 | neuron projection extension | 2 | BP | Cell morphogenesis | C1 |
| GO:0050770 | regulation of axonogenesis | 2 | BP | Cell morphogenesis | C1 |
| GO:0010810 | regulation of cell-substrate adhesion | 2 | BP | Cell morphogenesis | C1 |
| GO:0030426 | growth cone | 2 | CC | Cell morphogenesis | C1 |
| GO:0030427 | site of polarized growth | 2 | CC | Cell morphogenesis | C1 |
| GO:0019901 | protein kinase binding | 2.82842712 | MF | metabolic process | C1 |
| GO:0043086 | negative regulation of catalytic activity | 2.64575131 | BP | metabolic process | C1 |
| GO:1905475 | regulation of protein localization to membrane | 2 | BP | metabolic process | C1 |
| GO:0019915 | lipid storage | 2 | BP | metabolic process | C1 |
| GO:0031644 | regulation of neurological system process | 2 | BP | neurological system process | C1 |
| GO:0099003 | vesicle-mediated transport in synapse | 2.23606798 | BP | vesicle-mediated transport | C1 |
| GO:0060627 | regulation of vesicle-mediated transport | 2 | BP | vesicle-mediated transport | C1 |
| GO:0030952 | establishment or maintenance of cytoskeleton polarity | 2.82842713 | BP | cell polarity maintenance | C2 |
| GO:0007163 | establishment or maintenance of cell polarity | 2.82842713 | BP | cell polarity maintenance | C2 |
| GO:0008610 | lipid biosynthetic process | 2.64575131 | BP | metabolic process | C2 |
| GO:0006790 | sulfur compound metabolic process | 2.12132034 | BP | metabolic process | C2 |
| GO:0010761 | fibroblast migration | 2 | BP | cell polarity maintenance | C2 |
| GO:0048471 | perinuclear region of cytoplasm | 2 | CC | perinuclear region | C2 |
| GO:0097193 | intrinsic apoptotic signaling pathway | 3.35658557 | BP | cell death | C3 |
| GO:0010942 | positive regulation of cell death | 2.88675135 | BP | cell death | C3 |
| GO:2001242 | regulation of intrinsic apoptotic signaling pathway | 2.64575131 | BP | cell death | C3 |
| GO:2001233 | regulation of apoptotic signaling pathway | 2.64575131 | BP | cell death | C3 |
| GO:0043065 | positive regulation of apoptotic process | 2.52982213 | BP | cell death | C3 |
| GO:0043068 | positive regulation of programmed cell death | 2.52982213 | BP | cell death | C3 |
| GO:0097190 | apoptotic signaling pathway | 2.33333333 | BP | cell death | C3 |
| GO:2001243 | negative regulation of intrinsic apoptotic signaling pathway | 2 | BP | cell death | C3 |
| GO:0032873 | negative regulation of stress-activated MAPK cascade | 3.35658557 | BP | metabolic process | C3 |
| GO:0010563 | negative regulation of phosphorus metabolic process | 2.33333333 | BP | metabolic process | C3 |
| GO:0045936 | negative regulation of phosphate metabolic process | 2.33333333 | BP | metabolic process | C3 |
| GO:0031400 | negative regulation of protein modification process | 2.33333333 | BP | metabolic process | C3 |
| GO:0060590 | ATPase regulator activity | 2.23606798 | MF | metabolic process | C3 |
| GO:0060589 | nucleoside-triphosphatase regulator activity | 2.23606798 | MF | metabolic process | C3 |
| GO:0042326 | negative regulation of phosphorylation | 2.12132034 | BP | metabolic process | C3 |
| GO:1902532 | negative regulation of intracellular signal transduction | 2.12132034 | BP | metabolic process | C3 |
| GO:0032781 | positive regulation of ATPase activity | 2 | BP | metabolic process | C3 |
| GO:0043462 | regulation of ATPase activity | 2 | BP | metabolic process | C3 |
| GO:0001678 | cellular glucose homeostasis | 2 | BP | metabolic process | C3 |
| GO:0001671 | ATPase activator activity | 2 | MF | metabolic process | C3 |
| GO:0006457 | protein folding | 3.87298335 | BP | protein binding | C3 |
| GO:0031072 | heat shock protein binding | 3.31662479 | MF | protein binding | C3 |
| GO:0051087 | chaperone binding | 3 | MF | protein binding | C3 |
| GO:0051085 | chaperone cofactor-dependent protein refolding | 2.7136021 | BP | protein binding | C3 |
| GO:0061077 | chaperone-mediated protein folding | 2.64575131 | BP | protein binding | C3 |
| GO:0051082 | unfolded protein binding | 2.64575131 | MF | protein binding | C3 |
| GO:0006458 | de novo protein folding | 2.44948974 | BP | protein binding | C3 |
| GO:0051084 | de novo posttranslational protein folding | 2.44948974 | BP | protein binding | C3 |
| GO:0031625 | ubiquitin protein ligase binding | 2.12132034 | MF | protein binding | C3 |
| GO:0044389 | ubiquitin-like protein ligase binding | 2.12132034 | MF | protein binding | C3 |
| GO:0051879 | Hsp90 protein binding | 2 | MF | protein binding | C3 |
| GO:0072594 | establishment of protein localization to organelle | 2.64575131 | BP | protein localization | C3 |
| GO:0072655 | establishment of protein localization to mitochondrion | 2 | BP | protein localization | C3 |
| GO:0070585 | protein localization to mitochondrion | 2 | BP | protein localization | C3 |
| GO:1903828 | negative regulation of cellular protein localization | 2 | BP | protein localization | C3 |
| GO:0006986 | response to unfolded protein | 3.2071349 | BP | response to stimulus | C3 |
| GO:0014070 | response to organic cyclic compound | 3 | BP | response to stimulus | C3 |
| GO:0032870 | cellular response to hormone stimulus | 2.82842712 | BP | response to stimulus | C3 |
| GO:0035966 | response to topologically incorrect protein | 2.64575131 | BP | response to stimulus | C3 |
| GO:0071407 | cellular response to organic cyclic compound | 2.64575131 | BP | response to stimulus | C3 |
| GO:0071383 | cellular response to steroid hormone stimulus | 2.44948974 | BP | response to stimulus | C3 |
| GO:0009755 | hormone-mediated signaling pathway | 2.44948974 | BP | response to stimulus | C3 |
| GO:0048545 | response to steroid hormone | 2.44948974 | BP | response to stimulus | C3 |
| GO:0080135 | regulation of cellular response to stress | 2.33333333 | BP | response to stimulus | C3 |
| GO:0071396 | cellular response to lipid | 2.33333333 | BP | response to stimulus | C3 |
| GO:0034620 | cellular response to unfolded protein | 2.23606798 | BP | response to stimulus | C3 |
| GO:0035967 | cellular response to topologically incorrect protein | 2.23606798 | BP | response to stimulus | C3 |
| GO:0034976 | response to endoplasmic reticulum stress | 2.23606798 | BP | response to stimulus | C3 |
| GO:0043401 | steroid hormone mediated signaling pathway | 2.23606798 | BP | response to stimulus | C3 |
| GO:0009725 | response to hormone | 2.18282063 | BP | response to stimulus | C3 |
| GO:0042594 | response to starvation | 2 | BP | response to stimulus | C3 |
| GO:0030518 | intracellular steroid hormone receptor signaling pathway | 2 | BP | response to stimulus | C3 |
| GO:0015935 | small ribosomal subunit | 2 | CC | ribosome | C3 |
| GO:0007610 | behavior | 4.26401433 | BP | brain development | C4 |
| GO:0007420 | brain development | 2.82842712 | BP | brain development | C4 |
| GO:0060322 | head development | 2.82842712 | BP | brain development | C4 |
| GO:0051962 | positive regulation of nervous system development | 2.44948974 | BP | brain development | C4 |
| GO:0021537 | telencephalon development | 2.23606798 | BP | brain development | C4 |
| GO:0030900 | forebrain development | 2.23606798 | BP | brain development | C4 |
| GO:0051961 | negative regulation of nervous system development | 2.23606798 | BP | brain development | C4 |
| GO:0009416 | response to light stimulus | 2 | BP | brain development | C4 |
| GO:0030534 | adult behavior | 2 | BP | brain development | C4 |
| GO:0007611 | learning or memory | 2 | BP | brain development | C4 |
| GO:0050890 | cognition | 2 | BP | brain development | C4 |
| GO:0008217 | regulation of blood pressure | 2 | BP | brain development | C4 |
| GO:0042063 | gliogenesis | 3.31662479 | BP | cell differentiation and gliogenesis | C4 |
| GO:0010001 | glial cell differentiation | 3 | BP | cell differentiation and gliogenesis | C4 |
| GO:0048708 | astrocyte differentiation | 3 | BP | cell differentiation and gliogenesis | C4 |
| GO:0021782 | glial cell development | 2.44948974 | BP | cell differentiation and gliogenesis | C4 |
| GO:0048709 | oligodendrocyte differentiation | 2 | BP | cell differentiation and gliogenesis | C4 |
| GO:0042552 | myelination | 2 | BP | cell differentiation and gliogenesis | C4 |
| GO:0007272 | ensheathment of neurons | 2 | BP | cell differentiation and gliogenesis | C4 |
| GO:0008366 | axon ensheathment | 2 | BP | cell differentiation and gliogenesis | C4 |
| GO:0014013 | regulation of gliogenesis | 2 | BP | cell differentiation and gliogenesis | C4 |
| GO:0050768 | negative regulation of neurogenesis | 2 | BP | cell differentiation and gliogenesis | C4 |
| GO:0043209 | myelin sheath | 2 | CC | cell differentiation and gliogenesis | C4 |
| GO:0048858 | cell projection morphogenesis | 2.44948974 | BP | cell morphogenesis | C4 |
| GO:0032990 | cell part morphogenesis | 2.44948974 | BP | cell morphogenesis | C4 |
| GO:0097449 | astrocyte projection | 2.44948974 | CC | cell morphogenesis | C4 |
| GO:0030426 | growth cone | 2.44948974 | CC | cell morphogenesis | C4 |
| GO:0030427 | site of polarized growth | 2.44948974 | CC | cell morphogenesis | C4 |
| GO:0097386 | glial cell projection | 2 | CC | cell morphogenesis | C4 |
| GO:0043197 | dendritic spine | 2 | CC | cell morphogenesis | C4 |
| GO:0044309 | neuron spine | 2 | CC | cell morphogenesis | C4 |
| GO:0046394 | carboxylic acid biosynthetic process | 3.60555128 | BP | metabolic process | C4 |
| GO:0017144 | drug metabolic process | 2.82842712 | BP | metabolic process | C4 |
| GO:1903018 | regulation of glycoprotein metabolic process | 2.44948974 | BP | metabolic process | C4 |
| GO:0016053 | organic acid biosynthetic process | 2.44948974 | BP | metabolic process | C4 |
| GO:0006091 | generation of precursor metabolites and energy | 2.44948974 | BP | metabolic process | C4 |
| GO:0055086 | nucleobase-containing small molecule metabolic process | 2.44948974 | BP | metabolic process | C4 |
| GO:0044283 | small molecule biosynthetic process | 2.44948974 | BP | metabolic process | C4 |
| GO:0001101 | response to acid chemical | 2.23606798 | BP | metabolic process | C4 |
| GO:0032870 | cellular response to hormone stimulus | 2.23606798 | BP | metabolic process | C4 |
| GO:0072330 | monocarboxylic acid biosynthetic process | 2.23606798 | BP | metabolic process | C4 |
| GO:0072521 | purine-containing compound metabolic process | 2.23606798 | BP | metabolic process | C4 |
| GO:0009636 | response to toxic substance | 2.23606798 | BP | metabolic process | C4 |
| GO:0051186 | cofactor metabolic process | 2.12132034 | BP | metabolic process | C4 |
| GO:0010038 | response to metal ion | 2 | BP | metabolic process | C4 |
| GO:0046034 | ATP metabolic process | 2 | BP | metabolic process | C4 |
| GO:0009205 | purine ribonucleoside triphosphate metabolic process | 2 | BP | metabolic process | C4 |
| GO:0009167 | purine ribonucleoside monophosphate metabolic process | 2 | BP | metabolic process | C4 |
| GO:0009126 | purine nucleoside monophosphate metabolic process | 2 | BP | metabolic process | C4 |
| GO:0009199 | ribonucleoside triphosphate metabolic process | 2 | BP | metabolic process | C4 |
| GO:0009161 | ribonucleoside monophosphate metabolic process | 2 | BP | metabolic process | C4 |
| GO:0009144 | purine nucleoside triphosphate metabolic process | 2 | BP | metabolic process | C4 |
| GO:0009123 | nucleoside monophosphate metabolic process | 2 | BP | metabolic process | C4 |
| GO:0009141 | nucleoside triphosphate metabolic process | 2 | BP | metabolic process | C4 |
| GO:0006732 | coenzyme metabolic process | 2 | BP | metabolic process | C4 |
| GO:0006520 | cellular amino acid metabolic process | 2 | BP | metabolic process | C4 |
| GO:0042623 | ATPase activity, coupled | 2 | MF | metabolic process | C4 |
| GO:0030424 | axon | 3.87298335 | CC | neuronal cell | C4 |
| GO:0043025 | neuronal cell body | 3.74165739 | CC | neuronal cell | C4 |
| GO:0030425 | dendrite | 3 | CC | neuronal cell | C4 |
| GO:0097447 | dendritic tree | 3 | CC | neuronal cell | C4 |
| GO:0033267 | axon part | 2.64575131 | CC | neuronal cell | C4 |
| GO:0048471 | perinuclear region of cytoplasm | 2.64575131 | CC | neuronal cell | C4 |
| GO:0150034 | distal axon | 2.44948974 | CC | neuronal cell | C4 |
| GO:0043204 | perikaryon | 2 | CC | neuronal cell | C4 |
| GO:0016323 | basolateral plasma membrane | 2 | CC | neuronal cell | C4 |
| GO:0050808 | synapse organization | 3 | BP | synapse | C4 |
| GO:0098794 | postsynapse | 2.82842712 | CC | synapse | C4 |
| GO:0045121 | membrane raft | 2.82842712 | CC | synapse | C4 |
| GO:0097060 | synaptic membrane | 2.64575131 | CC | synapse | C4 |
| GO:0098857 | membrane microdomain | 2.64575131 | CC | synapse | C4 |
| GO:0098589 | membrane region | 2.64575131 | CC | synapse | C4 |
| GO:0098978 | glutamatergic synapse | 2.64575131 | CC | synapse | C4 |
| GO:0050807 | regulation of synapse organization | 2 | BP | synapse | C4 |
| GO:0050803 | regulation of synapse structure or activity | 2 | BP | synapse | C4 |
| GO:0099699 | integral component of synaptic membrane | 2 | CC | synapse | C4 |
| GO:0099240 | intrinsic component of synaptic membrane | 2 | CC | synapse | C4 |
| GO:0001504 | neurotransmitter uptake | 4.12310563 | BP | transmembrane transport | C4 |
| GO:0050804 | modulation of chemical synaptic transmission | 3 | BP | transmembrane transport | C4 |
| GO:0015318 | inorganic molecular entity transmembrane transporter activity | 3 | MF | transmembrane transport | C4 |
| GO:0001505 | regulation of neurotransmitter levels | 2.82842712 | BP | transmembrane transport | C4 |
| GO:0099177 | regulation of trans-synaptic signaling | 2.82842712 | BP | transmembrane transport | C4 |
| GO:0006836 | neurotransmitter transport | 2.64575131 | BP | transmembrane transport | C4 |
| GO:0006820 | anion transport | 2.64575131 | BP | transmembrane transport | C4 |
| GO:0010035 | response to inorganic substance | 2.64575131 | BP | transmembrane transport | C4 |
| GO:0006839 | mitochondrial transport | 2.64575131 | BP | transmembrane transport | C4 |
| GO:0046873 | metal ion transmembrane transporter activity | 2.64575131 | MF | transmembrane transport | C4 |
| GO:0022890 | inorganic cation transmembrane transporter activity | 2.64575131 | MF | transmembrane transport | C4 |
| GO:0008324 | cation transmembrane transporter activity | 2.64575131 | MF | transmembrane transport | C4 |
| GO:0098739 | import across plasma membrane | 2.44948974 | BP | transmembrane transport | C4 |
| GO:0006814 | sodium ion transport | 2.44948974 | BP | transmembrane transport | C4 |
| GO:0015077 | monovalent inorganic cation transmembrane transporter activity | 2.44948974 | MF | transmembrane transport | C4 |
| GO:0015672 | monovalent inorganic cation transport | 2.33333333 | BP | transmembrane transport | C4 |
| GO:0043269 | regulation of ion transport | 2.33333333 | BP | transmembrane transport | C4 |
| GO:0023061 | signal release | 2.33333333 | BP | transmembrane transport | C4 |
| GO:0015800 | acidic amino acid transport | 2.23606798 | BP | transmembrane transport | C4 |
| GO:0006865 | amino acid transport | 2.23606798 | BP | transmembrane transport | C4 |
| GO:0046942 | carboxylic acid transport | 2.23606798 | BP | transmembrane transport | C4 |
| GO:0015849 | organic acid transport | 2.23606798 | BP | transmembrane transport | C4 |
| GO:0015711 | organic anion transport | 2.23606798 | BP | transmembrane transport | C4 |
| GO:0002028 | regulation of sodium ion transport | 2.23606798 | BP | transmembrane transport | C4 |
| GO:0051047 | positive regulation of secretion | 2.23606798 | BP | transmembrane transport | C4 |
| GO:0050806 | positive regulation of synaptic transmission | 2.23606798 | BP | transmembrane transport | C4 |
| GO:0005743 | mitochondrial inner membrane | 2.23606798 | CC | transmembrane transport | C4 |
| GO:0019866 | organelle inner membrane | 2.23606798 | CC | transmembrane transport | C4 |
| GO:0015081 | sodium ion transmembrane transporter activity | 2.23606798 | MF | transmembrane transport | C4 |
| GO:0022804 | active transmembrane transporter activity | 2.23606798 | MF | transmembrane transport | C4 |
| GO:0043090 | amino acid import | 2 | BP | transmembrane transport | C4 |
| GO:0006835 | dicarboxylic acid transport | 2 | BP | transmembrane transport | C4 |
| GO:0098656 | anion transmembrane transport | 2 | BP | transmembrane transport | C4 |
| GO:0098659 | inorganic cation import across plasma membrane | 2 | BP | transmembrane transport | C4 |
| GO:0099587 | inorganic ion import across plasma membrane | 2 | BP | transmembrane transport | C4 |
| GO:0035725 | sodium ion transmembrane transport | 2 | BP | transmembrane transport | C4 |
| GO:0043270 | positive regulation of ion transport | 2 | BP | transmembrane transport | C4 |
| GO:0090277 | positive regulation of peptide hormone secretion | 2 | BP | transmembrane transport | C4 |
| GO:0046887 | positive regulation of hormone secretion | 2 | BP | transmembrane transport | C4 |
| GO:0050714 | positive regulation of protein secretion | 2 | BP | transmembrane transport | C4 |
| GO:0002793 | positive regulation of peptide secretion | 2 | BP | transmembrane transport | C4 |
| GO:0008509 | anion transmembrane transporter activity | 2 | MF | transmembrane transport | C4 |
| GO:0032024 | positive regulation of insulin secretion | 2 | BP | transmembrane transport | C4 |
| GO:0010810 | regulation of cell-substrate adhesion | 2.41209076 | BP | cell adhesion | C5 |
| GO:0030155 | regulation of cell adhesion | 2.081666 | BP | cell adhesion | C5 |
| GO:0001952 | regulation of cell-matrix adhesion | 2.04124145 | BP | cell adhesion | C5 |
| GO:0120039 | plasma membrane bounded cell projection morphogenesis | 2.52982213 | BP | cell projection morphogenesis | C5 |
| GO:0048858 | cell projection morphogenesis | 2.52982213 | BP | cell projection morphogenesis | C5 |
| GO:0048589 | developmental growth | 2.47487373 | BP | cell projection morphogenesis | C5 |
| GO:0048812 | neuron projection morphogenesis | 2.46598481 | BP | cell projection morphogenesis | C5 |
| GO:0032990 | cell part morphogenesis | 2.34260643 | BP | cell projection morphogenesis | C5 |
| GO:1990138 | neuron projection extension | 2.32379001 | BP | cell projection morphogenesis | C5 |
| GO:0003779 | actin binding | 2.5560386 | MF | cytoskeleton origanization | C5 |
| GO:0008154 | actin polymerization or depolymerization | 2.30940108 | BP | cytoskeleton origanization | C5 |
| GO:0015629 | actin cytoskeleton | 2.29365855 | CC | cytoskeleton origanization | C5 |
| GO:0030036 | actin cytoskeleton organization | 2.17759856 | BP | cytoskeleton origanization | C5 |
| GO:0030029 | actin filament-based process | 2.1602469 | BP | cytoskeleton origanization | C5 |
| GO:0048008 | platelet-derived growth factor receptor signaling pathway | 3.4 | BP | PDGFRα and Ras signal pathway | C5 |
| GO:0007169 | transmembrane receptor protein tyrosine kinase signaling pathway | 3.4 | BP | PDGFRα and Ras signal pathway | C5 |
| GO:0007264 | small GTPase mediated signal transduction | 3.02371578 | BP | PDGFRα and Ras signal pathway | C5 |
| GO:0051020 | GTPase binding | 2.92118697 | MF | PDGFRα and Ras signal pathway | C5 |
| GO:0007265 | Ras protein signal transduction | 2.85773803 | BP | PDGFRα and Ras signal pathway | C5 |
| GO:0017016 | Ras GTPase binding | 2.29365855 | MF | PDGFRα and Ras signal pathway | C5 |
| GO:0031267 | small GTPase binding | 2.04124145 | MF | PDGFRα and Ras signal pathway | C5 |
| GO:0046578 | regulation of Ras protein signal transduction | 2 | BP | PDGFRα and Ras signal pathway | C5 |
| GO:0043161 | proteasome-mediated ubiquitin-dependent protein catabolic process | 2.13200716 | BP | Protein catabolic process | C5 |
| GO:0006511 | ubiquitin-dependent protein catabolic process | 2.12132034 | BP | Protein catabolic process | C5 |
| GO:0010498 | proteasomal protein catabolic process | 2.04124145 | BP | Protein catabolic process | C5 |

OLGs, oligodendrocytes; MF, Molecular Functions; CC, Cellular Components; BP, Biological Processes.

# Supplementary Table 3. Gene sets used for module scoring in OPCs and OLGs

| **Aging** | | | | | |
| --- | --- | --- | --- | --- | --- |
| Apod | Psmb8 | Fcgr2b | S100a4 | Tspo | Irf1 |
| Icam1 | Isg15 | C4b | Cebpb | Ptprc | Itgb2 |
| C1qa | Zfp703 | Cd74 | Tgfb1 | Tyrobp | Ube2l6 |
| Cd68 | Adgre1 | Cdkn1a | Cdkn2a | Trp53 | Lmnb1 |
| Tnf | Il1b | Bst1 | Parp14 | Itgam | B2m |
| H2-D1 | Rpl6 |  |  |  |  |
| **Apoptosis** | | | | | |
| Akap12 | Cdk5 | Mapk8 | Bcl2l1 | Ddit3 | Dnaja1 |
| Hsph1 | Xbp1 | Herpud1 | Sfpq | Plekhf1 | Parl |
| Bag3 | Lzts2 | Zbtb16 | Nr4a1 | Ctsb | Ctsd |
| Ctsh | Ctsl | Ctss | Jun | Nfkbia | Tuba1a |
| Ctsz |  |  |  |  |  |
| **Cholesterol Synthesis** | | | | | |
| Hmgcs1 | Hmgcr | Mvk | Pmvk | Mvd | Fdps |
| Fdft1 | Msmo1 | Nsdhl | Sc5d | Dhcr7 | Acat2 |
| Tm7sf2 | Dhcr24 | Ebb | Lbr |  |  |
| **Remyelination** | | | | | |
| Slc34a3 | Nkx2-9 | Ppp1r14a | BC024139 | Cyp2j12 | Fam178b |
| Slc4a5 | Mal | Kcnj13 | Prlr | Sspo | Fbxw15 |
| Aqp1 | A230009B12Rik | 1500015L24Rik | Gjc2 | Gm26747 | B230344G16Rik |
| S1pr5 | Il12rb1 | Ly6g6f | Adamtsl4 | Itgb4 | A930017K11Rik |
| Ptgds | Ttr | Kl | Mobp | Wfdc18 | Gpr15 |
| Anln | Serpinb1a | Mog | Aspa | Gm5535 | Casq1 |
| Nipal4 | Folr1 | Prr18 | Galnt5 | Pigz | Hapln2 |
| 4933413G19Rik | Cdc42ep2 | Opalin | Serpind1 | Defb42 | Gabrr2 |
| Ninj2 | Fa2h | Ripk4 | Sp7 | Sostdc1 | Tmem88b |
| Car14 | Galnt6 | NA | Gm12827 | Sgk2 | Plp1 |
| Cldn2 | Gm12530 | Abca4 | Smtnl2 | Galnt6os | Gm17552 |
| Itgad | Ccp110 | Plekhh1 | Tmem125 | Sec14l5 | Gm16168 |
| Ctnna3 | Cldn11 | Gpr62 | Enpp2 | Unc5b | Cntn2 |
| Il33 | Pde8a | Ermn | Pdlim2 | Myo1d | Il23a |
| 9330111N05Rik | Carns1 | Gjb1 | Klk6 | Scd3 | Tnfaip6 |
| Prr32 | Prrg1 | Cpm | Slc12a8 | Tspan2 | Gm12843 |
| Kcnk5 | Efhd1 | Mag | Gm5067 | 1700099I09Rik | Ddc |
| Clic6 | 44443 | Efhd1os | BC049715 | Gm17035 | Tppp3 |
| A930003A15Rik | Prr5l | Adamts2 | Ndrg1 | Mbp | Gm21984 |
| Smco3 | Plin4 | NA | Klhl4 | Nhlrc4 | Micall1 |
| Lpar1 | Xrcc3 | Tll2 | Otx2 | Fam83d | Gng8 |
| Qdpr | B230206H07Rik | Dock5 | 4930506C21Rik | Sez6l2 | Plekhg3 |
| Ugt8a | Shtn1 | Nmral1 | Col6a3 | Pdlim1 | Col2a1 |
| Slc5a11 | Adamts4 | D7Ertd443e | Pik3c2b | Kif13b | Abca2 |
| Chdh | Rab37 | Nid1 | Adgrg2 | Car2 | Ldlr |
| Gamt | Plpp2 | Trim59 | Pacs2 | Desi1 | Pcolce2 |
| Ttyh2 | Rasl12 | 2210411M09Rik | Wnt3 | Stmn4 | Mylk |
| Krt18 | Slc25a48 | Plcl1 | Ptprd | Ano4 | 2810468N07Rik |
| St6galnac3 | Arsg | Hhip | Gstm7 | Cldn14 | Rftn1 |
| Lgi3 | Tmem63a | Dapk2 | Nkx6-2 | Tprn | Adamtsl1 |
| Epha1 | Abca8a | Slco3a1 | Nkain1 | Slc45a3 | Rtkn2 |
| Efnb3 | Slc13a4 | Sdpr | Cd59a | Ldb3 | Dixdc1 |
| Gm2895 | Nfe2l3 | Il17rb | Nbas | Cers2 | Ctsk |
| Ankub1 | En2 | Trim36 | Jakmip3 | Gpt | Ttll7 |
| 1700088E04Rik | Evi2a | Emilin2 | Gsn | Atp8b1 | Srd5a1 |
| Map6d1 | Pigh | Pls1 | 2700046A07Rik | Josd2 | Gm15440 |
| Map7 | Pip4k2a | Bche | Mast4 | Cryab | Rhog |
| Fam222a | Tmeff1 | Piga | Slc4a2 | Gpr37 | Gm15912 |
| Tubb4a | Apod | Il11 | Arhgap23 | Cnp | Kndc1 |
| Casr | Acsm5 | Tmprss5 | Gal3st1 | Gm10687 | Hs3st1 |
| Fah | Ypel2 | 4933428G20Rik | Syne3 | Tmem151a | Lctl |
| Sypl | Foxn3 | Erbb3 | Otud7b | Fam57a | Trpv3 |
| Ly6g6d | Gm16958 | Adssl1 | Gm27403 | Trf | Zdhhc9 |
| Zfp536 | Hcn2 | Tppp | NA | Pkd2l1 | Clmn |
| Synm | Tnni1 | Depdc7 | Fgd3 | Cmtm5 | Hmgcs1 |
| Gng11 | Mcam | Kcna1 | Gm20425 | Rhou | Dbil5 |
| Nacad | Aim1l | Prob1 | Pllp | Slc44a1 | Tmem98 |
| Eps8l2 | Plk3 | Gm8770 | Tnfrsf13c | Afap1l1 | Xaf1 |
| Agpat4 | Rnf225 | Cd82 | Trim13 | Gm11611 | Aplp1 |
| St18 | Elovl1 | Dnajb2 | Aatk | Smad7 | Arrdc2 |
| Endod1 | Fcor | Sh3gl3 | Gm20458 | Rcbtb1 | 1700060J05Rik |
| Prox1 | Cyp51 | Gm16350 | Ccdc187 | Epb41l3 | 4933415A04Rik |
| Nppc | Plekhb1 | Jam3 | Dbndd2 | Enpp1 | Acss2os |
| Sccpdh | Epn3 | Ldlrap1 | Elovl7 | Rffl | Hipk2 |
| Pla2g3 | Insig1 | Gm16033 | Slc12a2 | 2810429I04Rik | Insc |
| Cpox | Cdr1 | Tmem117 | Cdk18 | Frmd8os | Dip2a |
| Gstp1 | Prima1 | Enpp4 | Plekhf1 | D16Ertd472e | Dhcr7 |
| Cml5 | Slc25a13 | Ccdc13 | Edil3 | Efna1 | Aph1a |
| Msmo1 | Rap1a | Cep97 | Cyth1 | Jph1 | Tmcc3 |
| Gm11295 | Arhgef28 | Atp1b3 | Stmn1 | Tdrd6 | Ppp1r16b |
| Gm42418 | Gm19705 | Gm11223 | Gm1848 | Synj2 | Fads6 |
| Fez1 | NA | Slain1os | Gnai1 | Cacna2d4 | Cdr2 |
| Plxnb3 | Ldlrad4 | Gm12744 | Prox1os | Elf5 | Frmd8 |
| Pvrl1 | Ermp1 | 5031439G07Rik | Shroom1 | Gm16240 | Tmeff2 |
| Gm7598 | Gm17114 | Adam19 | Litaf | Fgfr2 | Clcn5 |
| Carhsp1 | Scd1 | Gna12 | Slc48a1 | Ccdc24 | Dhcr24 |
| Mapk8ip1 | Phldb1 | Elovl6 | Rnf43 | Depdc1b | Sbf1 |
| Prkcq | Gm12144 | Mob3b | Olfml1 | Slc6a9 | Tmbim1 |
| Lrrn1 | Gm12362 | Usp54 | Arhgef10 | Gabra2 | Ank3 |
| Idi1 | Gm9392 | Gm10863 | Chp2 | Clic4 | Adap1 |
| Taldo1 | Fam53b | Ptpdc1 | Nkd1 | B3gnt9 | Rdh12 |
| 9930012K11Rik | Rnf13 | E330009J07Rik | Gm26788 | B3galt5 | Gm5873 |
| Kcna6 | Pkp4 | Srcin1 | Tmem141 | Slain1 | Pla2g4a |
| Prickle3 | Wscd1 | Kctd4 | Acsl1 | Bin1 | Sytl2 |
| Gm21975 | Evi2b | Ankrd13a | Gm3571 | Zdhhc20 | Kcnk13 |
| Fnbp1 | Gm9791 | Dusp26 | Cdkn1c | Pstpip2 | Larp6 |
| Ado | Pogk | Lzts2 | Gm16034 | Agap1 | Spg20 |
| Kif13a | 1700029I15Rik | Pcyt2 | Mir6363 | Rgs3 | Ube2d1 |
| Tmcc2 | Gss | Rasgrp3 | Cdc37l1 | Car13 | Dubr |
| Spns2 | Fdps | Lgals2 | Itpk1 | Setd8 | Nipa1 |
| Prox2os | Gltp | Usp30 | Gm14569 | Entpd5 | Sec11c |
| Lrig3 | Rhob | Dpy19l1 | Gm5148 | Gm27505 | Trmt13 |
| Mir6236 | Gm15477 | Kazn | Snx15 | Gm12276 | Mvd |
| Map7d1 | Cdr2l | Acss2 | Adi1 | Nod1 | Nrbp2 |
| Gm6781 | Grb14 | Frmd5 | Stard4 | 3110070M22Rik | Asah2 |
| Pex5l | Gm22877 | Hdac11 | Bpgm | Gm15350 | Dusp15 |
| Klhl2 | Lect1 | Nudt4 | Snx30 | Sox10 | Neat1 |
| Sh3bp5 | Gm26673 | Prox2 | Xrcc6 | P3h4 | Arrdc3 |
| Sass6 | Sc5d | Nrap | Cep72 | Wrap53 | Gm14573 |
| Secisbp2l | Myrf | Mapt | Gm23935 | Npc1 | Ptp4a1 |
| Aif1l | Fth1 | Mad1l1 | Dusp16 | Tmem189 | Clcn1 |
| Rnf7 | Gm17275 | Gatm | Nol3 | Dync1li2 | Cdc42ep1 |
| 6530409C15Rik | Bnip3l | Gm6977 | Fam131b | Enpp6 | Vmp1 |
| Eml2 | Slc26a11 | Grhpr | Mir1897 | Kif1b | Lars2 |
| Trp53inp2 | Lrrc1 | Ralgds | C2cd2 | Fign | Pla2g16 |
| 4930402H24Rik | Csrp1 | Stk39 | C630043F03Rik | NA | Sqle |
| Ebp | Tcap | Pak7 | Rassf8 | Tmem178b | Plin3 |
| Kat2b-ps | Sema3b | Morc4 | Kctd3 | Rnf141 | Slc9a3r2 |
| 9330104G04Rik | A230056P14Rik | Dpysl2 | NA | Smtn | Mtus1 |
| Sned1 | Atg4c | Dusp19 | Ell2 | Olig1 | BC034090 |
| Slc25a27 | Rtkn | Sh3tc2 | 2310015A10Rik | Tet1 | Klhdc8a |
| Enoph1 | Pcbp4 | Mvk | Pqlc2 | Gm11266 | Sox8 |
| Palm2 | Atp8a1 | Gm12758 | Gm5763 | Golga7 | Wdr54 |
| Gm9581 | Elavl3 | Omg | Gm27611 | Plod1 | Plekhh2 |
| Ick | Napepld | Poc1a | Fancc | Ankib1 | 44263 |
| Creb5 | Pld6 | Bnip3l-ps | 44440 | Gm4419 | Gm15347 |
| Sema4d | Adgrv1 | Degs1 | Shisa4 | Daam2 | Usp31 |
| Gm20319 | Cpa2 | 4931406P16Rik | Spock3 | Zfp773 | Daam1 |
| Tmem255b | Pdzd7 | Shroom2 | Cpd | Dock10 | Marcksl1 |
| Erbb2ip | Ppfibp2 | Inpp5a | Magt1 | Nkain2 | Dscaml1 |
| A730085K08Rik | Ywhaq | Pygm | Ccnjl | Mtmr2 | Atp11a |
| Arhgef37 | Thbs3 | Osbpl1a | Gm26588 | Gm8508 | Wnk1 |
| B430010I23Rik | Gm26846 |  |  |  |  |
| **Mitosis** | | | | | |
| Birc5 | Brca2 | Bub1 | Bub3 | Calm2 | Ccna2 |
| Ccnb2 | Ccne2 | Ccnf | Cdc25a | Cdc25b | Cdc25c |
| Cdk1 | Cdc45 | Cdc7 | Cdk2 | Cdkn1a | Cdkn2c |
| Cdkn2d | Cenpa | Cenpc1 | E2f1 | Ect2 | Ezh2 |
| Smc2 | Foxm1 | Hus1 | Incenp | Kif11 | Kif4 |
| Stmn1 | Lig1 | Lmnb1 | Mcm3 | Mcm2 | Mcm4 |
| Mcm6 | Anapc1 | Mki67 | Nek2 | Nudc | Nup62 |
| Pax6 | Pcna | Plk1 | Pole | Kif20a | Rad21 |
| Rad51 | Ran | Ranbp1 | Rbl1 | Rpa2 | Aurkb |
| Aurka | Tacc3 | Ttk | Wee1 | Donson | Cenpk |
| Tipin | Anapc11 | Cks2 | Spc25 | Nuf2 | Zfp830 |
| Ndc80 | Mis12 | Fbxo5 | Cdt1 | Nde1 | Cdca5 |
| Mrnip | Ncapd2 | Cdc6 | Cenph | Racgap1 | Dbf4 |
| Skp2 | Chek2 | Nasp | Knstrn | Cdca8 | Ncaph2 |
| Cks1b | Spag5 | Ncapg | Mad2l1 | Psrc1 | Sgo2a |
| Ube2c | Anln | Cep85 | Smc4 | Kif23 | Tpx2 |
| Sgo1 | Reep4 | Kif2c | Cep55 | Ckap5 | Ncapg2 |
| Dtl | Bora | Ube2s | Ncapd3 | Ckap2 | Rcc1 |
| Tubg1 | Tcf19 | Cdc20 | Cenpf | Nusap1 | Kif22 |
| Cdk5rap2 | Cntrob | Dlgap5 | Kif18a | Cenpe | Ccdc61 |
| Prc1 | Rfwd3 | Ofd1 | Atad5 | Kif20b | Ccnb1 |
| Clspn | Iqgap3 | Kifc1 | Arf6 | Aspm | Cdca3 |
| Hells | Plk4 | Terf1 | Timeless | Top2a | Vrk1 |
| Nek3 | Fzr1 | Orc6 | Sirt2 | Ska2 | Cenpw |
| Sac3d1 | Ska1 | Mis18a | Pmf1 | Spc24 | Cenps |
| Oip5 | Syce2 | Fam83d | Haus5 | Knl1 | Haus8 |
| Cdca2 | E2f8 | Pimreg | Triobp | Mis18bp1 | Haus4 |
| Ska3 | Haus1 | Haus3 | Cenpt | Ctcf | Fen1 |
| Banf1 | Rad18 | Smc6 | Esco2 | Cenpn | Ndc1 |
| Cenpq | Chtf18 | Hjurp | Mybl1 | Psmc3ip | Rad51ap1 |
| Rad54l | Fignl1 | Stk11 | Xpo1 |  |  |
| **Morphogenesis** | | | | | |
| Aatk | Abi1 | Abl1 | Alcam | Apbb1 | Apoe |
| App | Rnd2 | Bcl2 | Bmp7 | Bsg | Cck |
| Chl1 | Cit | Clu | Cnp | Dpysl2 | Dbnl |
| Dnm2 | Dst | Eif4g2 | Epha4 | Epha5 | Etv1 |
| Ptk2 | Fgfr2 | Fyn | Gap43 | Gas1 | Gas7 |
| Hnrnpk | Ilk | Itgb1 | Llgl1 | Lrp1 | Mag |
| Map1a | Map1b | Map6 | Mapt | Neo1 | Nfib |
| Ctnnd2 | Ntn1 | Ntrk2 | Ntrk3 | Pak3 | Enpp2 |
| Etv4 | Prkcz | Pmp22 | Pou3f2 | Ptn | Ptpn11 |
| Ptprm | Ptpro | Ptprz1 | Rab3a | Rac1 | Sema4a |
| Sema4c | Sema4d | Sema5a | Sgk1 | Tnr | Ubb |
| Ugt8a | Vldlr | Coro1b | Coro1c | Mgll | Zeb2 |
| Dpysl4 | Ss18l2 | Map4k4 | Ulk2 | Mink1 | Caprin1 |
| Sh3glb1 | Srcin1 | Rhog | Dip2a | Zswim6 | Kirrel3 |
| Rtn4 | Opa1 | Smurf1 | Rap2a | Kndc1 | Cyfip2 |
| Slitrk1 | Tmem108 | Wasf1 | Dnm3 | Kank1 | Plxnb3 |
| Dicer1 | Zfp365 | Phactr1 | Trio | Spg20 | Plppr4 |
| Arhgap35 | Gpm6a | Dip2b | Wasf2 | Rgma | Nfasc |
| Ephb1 | Nrcam | Dixdc1 | Ust | Brsk1 |  |

OPCs, oligodendrocyte progenitor cells; OLGs, oligodendrocytes.

# Supplementary Table 4. DEGs in age-related microglia (the C3 subset) versus other subsets

| **gene** | **p_val** | **avg_logFC** | **pct.1** | **pct.2** | **p_val_adj** |
| --- | --- | --- | --- | --- | --- |
| Lgals3 | 0 | 1.666299171 | 0.479 | 0.005 | 0 |
| Lpl | 7.58E-244 | 1.705876304 | 0.62 | 0.028 | 9.73E-240 |
| Lilrb4a | 2.65E-226 | 1.104180569 | 0.331 | 0.003 | 3.40E-222 |
| Spp1 | 7.35E-204 | 1.434009475 | 0.288 | 0.002 | 9.43E-200 |
| Itgax | 3.10E-152 | 0.905169063 | 0.319 | 0.009 | 3.98E-148 |
| Rab7b | 2.47E-145 | 0.716588478 | 0.221 | 0.002 | 3.16E-141 |
| Axl | 3.73E-136 | 1.11737544 | 0.423 | 0.025 | 4.79E-132 |
| Fxyd5 | 2.87E-116 | 1.119002525 | 0.454 | 0.036 | 3.68E-112 |
| Cst7 | 3.28E-113 | 1.368629509 | 0.632 | 0.082 | 4.21E-109 |
| Cd74 | 2.08E-102 | 1.323342275 | 0.62 | 0.085 | 2.67E-98 |
| Ch25h | 5.16E-101 | 0.547084884 | 0.135 | 0.001 | 6.62E-97 |
| Cybb | 9.98E-101 | 0.665961284 | 0.209 | 0.006 | 1.28E-96 |
| Cox6a2 | 1.81E-92 | 1.032940233 | 0.429 | 0.042 | 2.32E-88 |
| Igf1 | 3.83E-90 | 0.596901869 | 0.153 | 0.002 | 4.91E-86 |
| Vim | 7.21E-90 | 0.811312611 | 0.239 | 0.011 | 9.25E-86 |
| Lilr4b | 4.94E-86 | 0.379704509 | å | 0 | 6.33E-82 |
| Il1rn | 2.46E-81 | 0.368541594 | 0.11 | 0.001 | 3.15E-77 |
| Fam20c | 3.57E-81 | 0.791206502 | 0.264 | 0.016 | 4.57E-77 |
| Csf1 | 4.51E-80 | 0.768706223 | 0.27 | 0.017 | 5.78E-76 |
| Cd72 | 1.33E-77 | 0.885055976 | 0.337 | 0.03 | 1.70E-73 |
| Cd300lb | 3.90E-77 | 0.468553462 | 0.11 | 0.001 | 5.00E-73 |
| Pdcd1 | 1.50E-76 | 0.845021954 | 0.27 | 0.019 | 1.93E-72 |
| Ptger4 | 3.58E-70 | 0.402436439 | 0.123 | 0.002 | 4.60E-66 |
| Crip1 | 4.97E-65 | 0.949781204 | 0.368 | 0.046 | 6.38E-61 |
| Capg | 2.85E-63 | 1.022063191 | 0.601 | 0.125 | 3.66E-59 |
| Fgr | 2.70E-61 | 0.524029125 | 0.153 | 0.006 | 3.47E-57 |
| Gas2l3 | 1.31E-60 | 0.436244596 | 0.129 | 0.004 | 1.68E-56 |
| Nes | 3.79E-54 | 0.336448305 | 0.11 | 0.003 | 4.86E-50 |
| Wfdc17 | 5.55E-54 | 0.687360791 | 0.16 | 0.009 | 7.12E-50 |
| Glipr1 | 1.12E-53 | 0.828917947 | 0.331 | 0.044 | 1.43E-49 |
| Id2 | 8.44E-52 | 1.008090854 | 0.589 | 0.143 | 1.08E-47 |
| Cxcl16 | 7.44E-50 | 0.96701118 | 0.65 | 0.179 | 9.54E-46 |
| Bcl2a1d | 4.14E-49 | 0.710264971 | 0.27 | 0.031 | 5.31E-45 |
| Emp3 | 3.88E-47 | 0.797771881 | 0.497 | 0.103 | 4.98E-43 |
| Anxa2 | 4.58E-47 | 0.56242421 | 0.141 | 0.008 | 5.87E-43 |
| Anxa5 | 1.68E-44 | 0.848819678 | 0.552 | 0.135 | 2.16E-40 |
| Il2rg | 7.10E-44 | 0.483933362 | 0.141 | 0.009 | 9.10E-40 |
| Ccl3 | 2.53E-43 | 0.927092539 | 0.742 | 0.249 | 3.25E-39 |
| Ccl4 | 1.74E-42 | 1.018752299 | 0.644 | 0.2 | 2.23E-38 |
| Pianp | 3.11E-41 | 0.413373628 | 0.11 | 0.005 | 3.99E-37 |
| Cd63 | 6.04E-40 | 0.517108278 | 0.982 | 0.729 | 7.74E-36 |
| Apoe | 5.35E-37 | 0.676094506 | 0.939 | 0.714 | 6.86E-33 |
| Mdfic | 2.34E-36 | 0.377727099 | 0.141 | 0.011 | 3.00E-32 |
| Cd52 | 1.04E-35 | 0.6497167 | 0.883 | 0.527 | 1.33E-31 |
| Fabp3 | 2.09E-35 | 0.376483679 | 0.104 | 0.006 | 2.68E-31 |
| Cstb | 3.69E-35 | 0.798856267 | 0.73 | 0.305 | 4.74E-31 |
| Vat1 | 4.69E-35 | 0.533081551 | 0.184 | 0.021 | 6.01E-31 |
| AB124611 | 1.08E-34 | 0.477440785 | 0.16 | 0.015 | 1.38E-30 |
| Ifi27l2a | 7.86E-34 | 0.773136927 | 0.368 | 0.08 | 1.01E-29 |
| Apbb2 | 4.87E-31 | 0.637869146 | 0.325 | 0.067 | 6.24E-27 |
| Lgals1 | 6.67E-31 | 0.595624213 | 0.166 | 0.019 | 8.56E-27 |
| Clic4 | 6.92E-31 | 0.515918946 | 0.16 | 0.018 | 8.88E-27 |
| Nceh1 | 8.76E-31 | 0.5282725 | 0.184 | 0.024 | 1.12E-26 |
| Tpm4 | 1.39E-30 | 0.641958693 | 0.362 | 0.082 | 1.78E-26 |
| Rftn1 | 5.65E-30 | 0.481661507 | 0.184 | 0.024 | 7.25E-26 |
| Hcar2 | 1.03E-29 | 0.592549538 | 0.301 | 0.06 | 1.32E-25 |
| Aplp2 | 4.02E-29 | 0.641180784 | 0.448 | 0.121 | 5.15E-25 |
| Lyz2 | 4.13E-29 | 0.562161153 | 0.896 | 0.605 | 5.30E-25 |
| Adssl1 | 2.23E-28 | 0.597401648 | 0.331 | 0.074 | 2.85E-24 |
| Cpd | 8.31E-28 | 0.411526207 | 0.209 | 0.033 | 1.07E-23 |
| Gadd45b | 1.22E-27 | 0.620435204 | 0.27 | 0.054 | 1.56E-23 |
| Ctla2b | 5.33E-27 | 0.528858308 | 0.264 | 0.051 | 6.84E-23 |
| Ank | 9.73E-27 | 0.582184761 | 0.239 | 0.044 | 1.25E-22 |
| Rhoc | 2.73E-26 | 0.601514383 | 0.374 | 0.095 | 3.51E-22 |
| Plaur | 3.21E-26 | 0.59726717 | 0.196 | 0.031 | 4.12E-22 |
| Myo5a | 7.46E-26 | 0.359021176 | 0.123 | 0.012 | 9.57E-22 |
| Tlr2 | 2.19E-25 | 0.612929108 | 0.528 | 0.175 | 2.81E-21 |
| Ifitm3 | 3.76E-25 | 0.609953157 | 0.319 | 0.076 | 4.83E-21 |
| Il4i1 | 5.33E-25 | 0.45218903 | 0.16 | 0.022 | 6.83E-21 |
| Gm1673 | 1.28E-24 | 0.507212532 | 0.178 | 0.028 | 1.65E-20 |
| Tpi1 | 3.73E-24 | 0.643039769 | 0.687 | 0.309 | 4.79E-20 |
| Ell2 | 1.40E-23 | 0.315136475 | 0.123 | 0.014 | 1.80E-19 |
| Mfsd12 | 4.80E-23 | 0.549769518 | 0.202 | 0.037 | 6.16E-19 |
| St8sia6 | 7.50E-23 | 0.521693279 | 0.172 | 0.028 | 9.62E-19 |
| Bcl2a1a | 2.34E-22 | 0.566664916 | 0.448 | 0.14 | 3.01E-18 |
| Gpr65 | 2.47E-22 | 0.411385219 | 0.16 | 0.024 | 3.16E-18 |
| Coro1c | 2.68E-22 | 0.492075145 | 0.313 | 0.079 | 3.43E-18 |
| Gm10116 | 2.75E-22 | 0.605526155 | 0.712 | 0.341 | 3.52E-18 |
| Fabp5 | 4.24E-22 | 0.690298066 | 0.282 | 0.071 | 5.44E-18 |
| Hmox1 | 5.26E-22 | 0.508592523 | 0.35 | 0.094 | 6.75E-18 |
| Cdkn1a | 1.38E-21 | 0.548322553 | 0.294 | 0.074 | 1.77E-17 |
| Rap2b | 2.02E-21 | 0.482061667 | 0.184 | 0.033 | 2.59E-17 |
| Cxcl14 | 3.73E-21 | 0.566827202 | 0.239 | 0.054 | 4.78E-17 |
| Lgals3bp | 1.20E-20 | 0.566891347 | 0.54 | 0.203 | 1.54E-16 |
| AU020206 | 1.43E-20 | 0.468456569 | 0.301 | 0.077 | 1.83E-16 |
| Pkm | 1.74E-20 | 0.499997337 | 0.791 | 0.497 | 2.23E-16 |
| Mif | 1.05E-19 | 0.565220621 | 0.73 | 0.394 | 1.35E-15 |
| Csf2ra | 1.11E-19 | 0.467724778 | 0.325 | 0.091 | 1.43E-15 |
| H2-Ab1 | 1.19E-19 | 0.463939924 | 0.196 | 0.04 | 1.53E-15 |
| Cers6 | 4.67E-19 | 0.201628884 | 0.104 | 0.012 | 5.99E-15 |
| Pld3 | 1.05E-18 | 0.545210349 | 0.681 | 0.31 | 1.35E-14 |
| Ftl1 | 1.90E-18 | 0.142099036 | 0.988 | 0.985 | 2.43E-14 |
| H2-D1 | 2.16E-18 | 0.366472003 | 0.969 | 0.731 | 2.76E-14 |
| Ifi204 | 2.25E-18 | 0.393815094 | 0.153 | 0.027 | 2.89E-14 |
| Fblim1 | 2.71E-18 | 0.421962147 | 0.19 | 0.04 | 3.47E-14 |
| Ccrl2 | 3.22E-18 | 0.568609522 | 0.325 | 0.1 | 4.13E-14 |
| Chst2 | 5.47E-18 | 0.307336689 | 0.147 | 0.025 | 7.02E-14 |
| Cd83 | 9.27E-18 | 0.581296795 | 0.589 | 0.268 | 1.19E-13 |
| Cacna1a | 9.34E-18 | 0.32047737 | 0.117 | 0.017 | 1.20E-13 |
| Osm | 3.01E-17 | 0.403077575 | 0.202 | 0.046 | 3.87E-13 |
| Pdgfa | 3.19E-17 | 0.523556127 | 0.35 | 0.113 | 4.10E-13 |
| Ctsb | 6.74E-17 | 0.178438409 | 0.988 | 0.97 | 8.65E-13 |
| Anp32b | 6.76E-17 | 0.499262549 | 0.466 | 0.175 | 8.67E-13 |
| Tuba1c | 9.39E-17 | 0.365447907 | 0.166 | 0.034 | 1.20E-12 |
| Gem | 1.07E-16 | 0.420736202 | 0.202 | 0.047 | 1.38E-12 |
| Crlf2 | 1.30E-16 | 0.511966143 | 0.687 | 0.329 | 1.66E-12 |
| Arl5c | 1.58E-16 | 0.425342839 | 0.252 | 0.068 | 2.03E-12 |
| Fth1 | 2.97E-16 | 0.113100434 | 0.994 | 0.996 | 3.81E-12 |
| Siglecf | 4.63E-16 | 0.432941025 | 0.202 | 0.049 | 5.94E-12 |
| H2-Q7 | 4.70E-16 | 0.395265983 | 0.147 | 0.028 | 6.03E-12 |
| Tubb6 | 4.87E-16 | 0.343834791 | 0.16 | 0.033 | 6.24E-12 |
| Slamf8 | 9.53E-16 | 0.451781422 | 0.252 | 0.07 | 1.22E-11 |
| P2rx4 | 1.99E-15 | 0.496413156 | 0.485 | 0.196 | 2.55E-11 |
| Serpine1 | 2.53E-15 | 0.474024644 | 0.172 | 0.039 | 3.24E-11 |
| Haus8 | 3.41E-15 | 0.255921391 | 0.141 | 0.027 | 4.37E-11 |
| Anxa4 | 4.00E-15 | 0.377873568 | 0.196 | 0.048 | 5.12E-11 |
| Myo9b | 4.82E-15 | 0.374601964 | 0.19 | 0.046 | 6.19E-11 |
| Plin2 | 6.52E-15 | 0.367300739 | 0.215 | 0.056 | 8.36E-11 |
| Myo1e | 6.86E-15 | 0.336916414 | 0.16 | 0.034 | 8.80E-11 |
| Afp | 7.19E-15 | 0.257930973 | 0.117 | 0.02 | 9.23E-11 |
| Rgs1 | 7.64E-15 | 0.595388415 | 0.393 | 0.154 | 9.80E-11 |
| Alas1 | 7.78E-15 | 0.403465051 | 0.337 | 0.112 | 9.97E-11 |
| Bola2 | 1.14E-14 | 0.462012324 | 0.448 | 0.179 | 1.46E-10 |
| Flna | 1.19E-14 | 0.276673392 | 0.135 | 0.026 | 1.53E-10 |
| Fundc2 | 1.68E-14 | 0.385139707 | 0.331 | 0.11 | 2.15E-10 |
| Pea15a | 2.12E-14 | 0.477505338 | 0.62 | 0.285 | 2.72E-10 |
| Naa50 | 3.04E-14 | 0.377790589 | 0.356 | 0.122 | 3.90E-10 |
| Soat1 | 5.03E-14 | 0.341622028 | 0.276 | 0.085 | 6.46E-10 |
| Bcl2 | 1.20E-13 | 0.314743264 | 0.153 | 0.034 | 1.54E-09 |
| Aldoa | 1.61E-13 | 0.339229109 | 0.865 | 0.625 | 2.07E-09 |
| Tnfrsf12a | 2.20E-13 | 0.431835829 | 0.141 | 0.031 | 2.82E-09 |
| Adamts1 | 2.27E-13 | 0.522849318 | 0.172 | 0.044 | 2.92E-09 |
| Dgkz | 2.40E-13 | 0.350838901 | 0.331 | 0.115 | 3.07E-09 |
| Fam162a | 2.47E-13 | 0.434360341 | 0.288 | 0.098 | 3.17E-09 |
| Cisd3 | 2.66E-13 | 0.343426665 | 0.202 | 0.055 | 3.41E-09 |
| B4galnt1 | 3.25E-13 | 0.345496875 | 0.276 | 0.088 | 4.16E-09 |
| Plekhm2 | 3.75E-13 | 0.251575714 | 0.141 | 0.031 | 4.81E-09 |
| Slc15a3 | 5.93E-13 | 0.458323391 | 0.442 | 0.183 | 7.60E-09 |
| Bcl2a1b | 7.83E-13 | 0.394225378 | 0.798 | 0.496 | 1.00E-08 |
| Hif1a | 8.01E-13 | 0.388506728 | 0.368 | 0.139 | 1.03E-08 |
| Prdx1 | 8.22E-13 | 0.333183537 | 0.89 | 0.65 | 1.05E-08 |
| Rpsa | 1.26E-12 | 0.272368084 | 0.933 | 0.758 | 1.61E-08 |
| Gsto1 | 1.28E-12 | 0.395074444 | 0.362 | 0.138 | 1.64E-08 |
| Il11ra1 | 2.41E-12 | 0.35186588 | 0.374 | 0.143 | 3.09E-08 |
| Mthfd2 | 3.79E-12 | 0.446268978 | 0.252 | 0.084 | 4.86E-08 |
| 2010111I01Rik | 3.85E-12 | 0.307395499 | 0.11 | 0.022 | 4.94E-08 |
| Mien1 | 4.54E-12 | 0.394419764 | 0.503 | 0.22 | 5.83E-08 |
| Il1b | 5.48E-12 | 0.376659114 | 0.104 | 0.02 | 7.02E-08 |
| Gapdh | 5.49E-12 | 0.347439461 | 0.791 | 0.567 | 7.05E-08 |
| Eno1 | 6.14E-12 | 0.402761364 | 0.687 | 0.364 | 7.87E-08 |
| Tpd52 | 1.10E-11 | 0.410893143 | 0.558 | 0.267 | 1.42E-07 |
| Neat1 | 1.27E-11 | 0.35655471 | 0.307 | 0.112 | 1.62E-07 |
| Speg | 1.27E-11 | 0.354990963 | 0.209 | 0.063 | 1.63E-07 |
| Milr1 | 1.34E-11 | 0.392605429 | 0.227 | 0.073 | 1.72E-07 |
| Dnajb14 | 1.38E-11 | 0.353622674 | 0.301 | 0.11 | 1.77E-07 |
| Gm10269 | 1.40E-11 | 0.331188223 | 0.276 | 0.095 | 1.80E-07 |
| Uap1l1 | 1.40E-11 | 0.416738387 | 0.35 | 0.138 | 1.80E-07 |
| Tmsb10 | 1.56E-11 | 0.431969802 | 0.607 | 0.33 | 2.00E-07 |
| Atp1a1 | 1.57E-11 | 0.412429759 | 0.411 | 0.172 | 2.01E-07 |
| Nrp2 | 1.59E-11 | 0.283889875 | 0.141 | 0.034 | 2.04E-07 |
| Pgk1 | 1.66E-11 | 0.205052845 | 0.104 | 0.02 | 2.14E-07 |
| Rps18-ps3 | 1.78E-11 | 0.389588611 | 0.35 | 0.137 | 2.29E-07 |
| Ccl6 | 1.96E-11 | 0.500727274 | 0.632 | 0.373 | 2.51E-07 |
| Tspo | 2.03E-11 | 0.41305336 | 0.577 | 0.285 | 2.61E-07 |
| Cyb5r3 | 2.46E-11 | 0.311609676 | 0.288 | 0.102 | 3.15E-07 |
| Plekha1 | 2.67E-11 | 0.348203014 | 0.227 | 0.073 | 3.43E-07 |
| Atf3 | 2.88E-11 | 0.427110186 | 0.454 | 0.204 | 3.70E-07 |
| Tns3 | 4.44E-11 | 0.37322302 | 0.466 | 0.21 | 5.70E-07 |
| Pgd | 4.94E-11 | 0.385163782 | 0.405 | 0.171 | 6.34E-07 |
| Tbc1d1 | 5.65E-11 | 0.231370454 | 0.117 | 0.026 | 7.24E-07 |
| Ncl | 6.03E-11 | 0.383860669 | 0.644 | 0.332 | 7.73E-07 |
| Maged1 | 6.24E-11 | 0.381379 | 0.27 | 0.098 | 8.01E-07 |
| Snhg6 | 7.16E-11 | 0.292767915 | 0.27 | 0.095 | 9.19E-07 |
| H2afj | 7.72E-11 | 0.325361087 | 0.436 | 0.187 | 9.90E-07 |
| Nup50 | 7.91E-11 | 0.287795544 | 0.135 | 0.033 | 1.01E-06 |
| Gm10076 | 8.67E-11 | 0.341267974 | 0.362 | 0.146 | 1.11E-06 |
| H2-Q6 | 1.06E-10 | 0.304109573 | 0.104 | 0.022 | 1.36E-06 |
| Slc16a3 | 1.28E-10 | 0.360635991 | 0.239 | 0.083 | 1.64E-06 |
| Tagln2 | 1.28E-10 | 0.331333213 | 0.362 | 0.147 | 1.64E-06 |
| Acot9 | 1.37E-10 | 0.243069135 | 0.172 | 0.049 | 1.76E-06 |
| Limd1 | 1.40E-10 | 0.357472022 | 0.11 | 0.025 | 1.80E-06 |
| Chst11 | 2.14E-10 | 0.21186909 | 0.117 | 0.027 | 2.75E-06 |
| Gpi1 | 2.23E-10 | 0.365412773 | 0.589 | 0.29 | 2.86E-06 |
| Nab2 | 2.28E-10 | 0.351606929 | 0.215 | 0.071 | 2.92E-06 |
| Stk3 | 2.49E-10 | 0.269404839 | 0.129 | 0.032 | 3.19E-06 |
| Pkib | 2.68E-10 | 0.346649127 | 0.399 | 0.173 | 3.44E-06 |
| Tnf | 2.87E-10 | 0.409410302 | 0.245 | 0.09 | 3.68E-06 |
| Rilpl2 | 3.35E-10 | 0.285662125 | 0.147 | 0.04 | 4.29E-06 |
| Slfn2 | 3.36E-10 | 0.381704408 | 0.215 | 0.073 | 4.31E-06 |
| Gm11808 | 4.95E-10 | 0.351324505 | 0.479 | 0.223 | 6.35E-06 |
| Galnt7 | 5.31E-10 | 0.361007217 | 0.153 | 0.044 | 6.81E-06 |
| Ldha | 6.39E-10 | 0.40862297 | 0.638 | 0.382 | 8.20E-06 |
| Gpr162 | 6.45E-10 | 0.262750926 | 0.104 | 0.023 | 8.27E-06 |
| Pdap1 | 6.79E-10 | 0.317255971 | 0.387 | 0.166 | 8.71E-06 |
| Slc23a2 | 7.00E-10 | 0.249008136 | 0.215 | 0.072 | 8.97E-06 |
| Rassf3 | 7.36E-10 | 0.283645029 | 0.129 | 0.033 | 9.44E-06 |
| Dtnbp1 | 7.54E-10 | 0.367924214 | 0.356 | 0.152 | 9.67E-06 |
| Gng12 | 7.70E-10 | 0.32345962 | 0.301 | 0.118 | 9.88E-06 |
| Gm10020 | 8.17E-10 | 0.290886882 | 0.276 | 0.104 | 1.05E-05 |
| Sh3bgrl | 8.52E-10 | 0.24183507 | 0.117 | 0.028 | 1.09E-05 |
| Mrpl54 | 1.21E-09 | 0.260319835 | 0.374 | 0.155 | 1.55E-05 |
| Slc6a6 | 1.40E-09 | 0.344159164 | 0.436 | 0.201 | 1.80E-05 |
| Grwd1 | 1.55E-09 | 0.227806899 | 0.135 | 0.036 | 1.98E-05 |
| Gm10263 | 1.69E-09 | 0.300967495 | 0.374 | 0.162 | 2.16E-05 |
| Nap1l1 | 1.85E-09 | 0.331217699 | 0.319 | 0.132 | 2.37E-05 |
| Fau | 2.09E-09 | 0.346584925 | 0.233 | 0.086 | 2.68E-05 |
| Txndc17 | 2.19E-09 | 0.341675462 | 0.546 | 0.269 | 2.80E-05 |
| Msrb1 | 2.38E-09 | 0.272292397 | 0.227 | 0.081 | 3.05E-05 |
| Fdx1l | 2.72E-09 | 0.283986351 | 0.27 | 0.104 | 3.48E-05 |
| Coq10b | 3.04E-09 | 0.295828535 | 0.215 | 0.076 | 3.90E-05 |
| Abracl | 3.25E-09 | 0.267022683 | 0.442 | 0.198 | 4.17E-05 |
| Tmem205 | 3.47E-09 | 0.223914935 | 0.141 | 0.04 | 4.45E-05 |
| Eif4b | 4.46E-09 | 0.288150678 | 0.331 | 0.139 | 5.73E-05 |
| Smpdl3a | 4.66E-09 | 0.370138301 | 0.239 | 0.092 | 5.98E-05 |
| Degs1 | 4.84E-09 | 0.293821977 | 0.38 | 0.168 | 6.21E-05 |
| Galk1 | 5.39E-09 | 0.206644575 | 0.209 | 0.072 | 6.92E-05 |
| Babam1 | 6.21E-09 | 0.257367497 | 0.264 | 0.102 | 7.97E-05 |
| Hacd2 | 6.78E-09 | 0.29918644 | 0.27 | 0.107 | 8.70E-05 |
| Pfkfb3 | 6.79E-09 | 0.316270013 | 0.215 | 0.078 | 8.71E-05 |
| Tnfsf13b | 8.71E-09 | 0.303467487 | 0.307 | 0.128 | 0.00011173 |
| Hpcal1 | 1.04E-08 | 0.302945955 | 0.264 | 0.105 | 0.00013337 |
| Ccl9 | 1.08E-08 | 0.466924152 | 0.534 | 0.318 | 0.00013891 |
| Ccdc88a | 1.16E-08 | 0.350236863 | 0.172 | 0.057 | 0.00014917 |
| Ipo7 | 1.43E-08 | 0.235532204 | 0.153 | 0.048 | 0.00018294 |
| Cadm1 | 1.45E-08 | 0.378441392 | 0.65 | 0.388 | 0.00018637 |
| Vmp1 | 1.54E-08 | 0.356561706 | 0.393 | 0.184 | 0.00019796 |
| Gm7808 | 1.62E-08 | 0.219305719 | 0.147 | 0.045 | 0.00020724 |
| C3ar1 | 1.67E-08 | 0.34091286 | 0.62 | 0.339 | 0.00021473 |
| Pgam1 | 1.82E-08 | 0.354568521 | 0.595 | 0.329 | 0.00023406 |
| Dennd4b | 1.94E-08 | 0.137230133 | 0.104 | 0.026 | 0.00024832 |
| Hspd1 | 1.94E-08 | 0.289995439 | 0.362 | 0.162 | 0.00024868 |
| 1600002K03Rik | 1.97E-08 | 0.270564938 | 0.153 | 0.049 | 0.00025226 |
| Coa5 | 1.98E-08 | 0.262604614 | 0.16 | 0.052 | 0.00025408 |
| Pa2g4 | 2.01E-08 | 0.308196353 | 0.374 | 0.172 | 0.00025831 |
| Gtf3c6 | 2.10E-08 | 0.337765694 | 0.221 | 0.084 | 0.00026944 |
| H2-K1 | 2.18E-08 | 0.320543056 | 0.81 | 0.524 | 0.00027975 |
| Atp6v1b2 | 2.25E-08 | 0.284975828 | 0.411 | 0.193 | 0.00028798 |
| Atp6v1a | 2.29E-08 | 0.22019019 | 0.264 | 0.104 | 0.00029309 |
| Snd1 | 2.39E-08 | 0.282357162 | 0.19 | 0.068 | 0.00030642 |
| Gm9844 | 2.41E-08 | 0.228501456 | 0.11 | 0.029 | 0.00030883 |
| Rpl27-ps3 | 2.41E-08 | 0.307382239 | 0.368 | 0.168 | 0.00030957 |
| Igsf6 | 2.47E-08 | 0.305128687 | 0.252 | 0.101 | 0.00031672 |
| Hnrnpa1 | 2.60E-08 | 0.330018033 | 0.534 | 0.278 | 0.00033333 |
| AW112010 | 2.63E-08 | 0.282530547 | 0.325 | 0.143 | 0.00033791 |
| Siva1 | 2.77E-08 | 0.22710525 | 0.209 | 0.076 | 0.00035549 |
| Hcst | 2.80E-08 | 0.224362933 | 0.301 | 0.125 | 0.00035911 |
| Eif3a | 3.01E-08 | 0.23569913 | 0.374 | 0.166 | 0.0003855 |
| Ndufa1 | 3.02E-08 | 0.304257224 | 0.509 | 0.258 | 0.00038741 |
| Spg21 | 3.24E-08 | 0.276441387 | 0.436 | 0.207 | 0.00041556 |
| Gna13 | 3.37E-08 | 0.278140992 | 0.374 | 0.171 | 0.00043259 |
| Fgfr1op2 | 3.38E-08 | 0.2519522 | 0.362 | 0.162 | 0.0004337 |
| Txn1 | 3.95E-08 | 0.300191064 | 0.497 | 0.249 | 0.00050719 |
| Hmgn3 | 4.02E-08 | 0.242079523 | 0.19 | 0.068 | 0.00051517 |
| Vcam1 | 4.09E-08 | 0.359517383 | 0.11 | 0.03 | 0.00052442 |
| Aurkaip1 | 4.18E-08 | 0.273669153 | 0.442 | 0.212 | 0.00053582 |
| Npm1 | 4.18E-08 | 0.31536506 | 0.779 | 0.521 | 0.00053674 |
| Dap | 4.24E-08 | 0.2849441 | 0.325 | 0.144 | 0.0005444 |
| Atp5g3 | 4.55E-08 | 0.280959892 | 0.423 | 0.202 | 0.00058308 |
| Tgoln1 | 4.63E-08 | 0.299881939 | 0.35 | 0.161 | 0.00059427 |
| Wbp5 | 4.88E-08 | 0.266144725 | 0.344 | 0.156 | 0.00062621 |
| Bst2 | 4.90E-08 | 0.331351417 | 0.644 | 0.369 | 0.00062872 |
| Tmem106a | 5.29E-08 | 0.277764788 | 0.202 | 0.075 | 0.00067896 |
| Apobec1 | 5.78E-08 | 0.261390731 | 0.27 | 0.113 | 0.00074157 |
| Tmem97 | 5.91E-08 | 0.199189865 | 0.141 | 0.044 | 0.00075799 |
| Rbm17 | 6.19E-08 | 0.28868311 | 0.276 | 0.118 | 0.00079393 |
| Aprt | 6.22E-08 | 0.248487005 | 0.387 | 0.178 | 0.00079773 |
| 1810058I24Rik | 6.82E-08 | 0.29924083 | 0.399 | 0.195 | 0.00087525 |
| Nab1 | 6.83E-08 | 0.25488264 | 0.104 | 0.028 | 0.00087604 |
| Dpp7 | 7.39E-08 | 0.327455462 | 0.252 | 0.106 | 0.00094787 |
| Cops6 | 7.43E-08 | 0.259668318 | 0.436 | 0.208 | 0.00095271 |
| Npc2 | 7.47E-08 | 0.167099821 | 0.957 | 0.882 | 0.00095811 |
| Cdk5 | 7.60E-08 | 0.293527667 | 0.153 | 0.051 | 0.00097489 |
| Serpinb6a | 7.63E-08 | 0.220667592 | 0.11 | 0.03 | 0.00097873 |
| Taf10 | 7.67E-08 | 0.220701901 | 0.245 | 0.098 | 0.00098351 |
| Rora | 7.83E-08 | 0.209347661 | 0.11 | 0.03 | 0.00100403 |
| Cd9 | 7.85E-08 | 0.145746729 | 0.988 | 0.951 | 0.00100673 |
| Tmem251 | 7.98E-08 | 0.202400808 | 0.221 | 0.085 | 0.00102309 |
| C1qbp | 8.36E-08 | 0.266868059 | 0.454 | 0.223 | 0.00107246 |
| Uba52 | 9.04E-08 | 0.186290835 | 0.209 | 0.078 | 0.00115935 |
| Sgpl1 | 9.94E-08 | 0.267286516 | 0.331 | 0.149 | 0.00127548 |
| Pip5k1c | 1.05E-07 | 0.199112546 | 0.172 | 0.06 | 0.00134256 |
| Eef1g | 1.05E-07 | 0.29176251 | 0.81 | 0.566 | 0.00135304 |
| Scd2 | 1.07E-07 | 0.284408577 | 0.307 | 0.136 | 0.00137591 |
| Rexo2 | 1.10E-07 | 0.285780629 | 0.393 | 0.19 | 0.0014059 |
| Nme1 | 1.14E-07 | 0.356868544 | 0.46 | 0.247 | 0.00145711 |
| Gm42418 | 1.16E-07 | 0.310683033 | 0.35 | 0.166 | 0.00149141 |
| Cln5 | 1.18E-07 | 0.341451432 | 0.344 | 0.165 | 0.00150898 |
| Slamf9 | 1.18E-07 | 0.328272261 | 0.503 | 0.273 | 0.00150976 |
| Arl11 | 1.18E-07 | 0.304625223 | 0.337 | 0.158 | 0.00151729 |
| Plekho2 | 1.22E-07 | 0.272515157 | 0.141 | 0.046 | 0.00157012 |
| Spcs3 | 1.24E-07 | 0.26895841 | 0.307 | 0.136 | 0.00159266 |
| Pebp1 | 1.27E-07 | 0.337022165 | 0.73 | 0.446 | 0.00162446 |
| Tnfrsf11a | 1.32E-07 | 0.19069498 | 0.178 | 0.064 | 0.00169394 |
| Tnip2 | 1.37E-07 | 0.260828637 | 0.147 | 0.049 | 0.00175135 |
| Eif1a | 1.40E-07 | 0.266812977 | 0.221 | 0.088 | 0.00179592 |
| Sowahc | 1.42E-07 | 0.241829242 | 0.313 | 0.14 | 0.00181677 |
| Tgif1 | 1.45E-07 | 0.255571371 | 0.344 | 0.16 | 0.00185675 |
| Pcna | 1.47E-07 | 0.274456184 | 0.172 | 0.062 | 0.00188929 |
| Cyb5r1 | 1.51E-07 | 0.214828091 | 0.104 | 0.029 | 0.00193624 |
| Prmt7 | 1.64E-07 | 0.239638568 | 0.153 | 0.052 | 0.00210963 |
| Psat1 | 1.68E-07 | 0.268081978 | 0.184 | 0.068 | 0.00215938 |
| Rpl10a | 1.78E-07 | 0.160884309 | 0.939 | 0.851 | 0.00228322 |
| Plekhf2 | 1.84E-07 | 0.252742705 | 0.356 | 0.164 | 0.00236117 |
| Rtcb | 2.02E-07 | 0.295853911 | 0.497 | 0.26 | 0.00259579 |
| 3110082I17Rik | 2.05E-07 | 0.148652919 | 0.117 | 0.034 | 0.00262307 |
| Atp8a1 | 2.20E-07 | 0.283559238 | 0.264 | 0.114 | 0.00281539 |
| Nfkbiz | 2.21E-07 | 0.348906382 | 0.239 | 0.103 | 0.0028406 |
| Lat2 | 2.45E-07 | 0.313349549 | 0.656 | 0.39 | 0.00313737 |
| Rpl36-ps3 | 2.46E-07 | 0.206727354 | 0.227 | 0.092 | 0.00314887 |
| Impdh2 | 2.59E-07 | 0.296550694 | 0.313 | 0.144 | 0.00332626 |
| Bola3 | 2.79E-07 | 0.152969712 | 0.221 | 0.087 | 0.00358207 |
| Golga4 | 2.88E-07 | 0.211640849 | 0.166 | 0.059 | 0.00369751 |
| Ctsz | 2.92E-07 | 0.123162857 | 1 | 0.971 | 0.00374149 |
| Tnfsf12 | 2.93E-07 | 0.246199117 | 0.233 | 0.096 | 0.00375519 |
| Rps26-ps1 | 2.94E-07 | 0.256532322 | 0.374 | 0.18 | 0.00376658 |
| Svbp | 3.08E-07 | 0.23430188 | 0.393 | 0.189 | 0.00394851 |
| Cklf | 3.12E-07 | 0.251082989 | 0.301 | 0.135 | 0.00399551 |
| Phb | 3.23E-07 | 0.239367293 | 0.282 | 0.124 | 0.00414627 |
| Hat1 | 3.25E-07 | 0.194022662 | 0.153 | 0.053 | 0.00417099 |
| Rpl12 | 3.40E-07 | 0.193149535 | 0.883 | 0.754 | 0.00435548 |
| Mapkapk2 | 3.46E-07 | 0.259047139 | 0.184 | 0.07 | 0.00443142 |
| Ndufb2 | 3.54E-07 | 0.269074611 | 0.393 | 0.192 | 0.00454002 |
| Uchl5 | 3.59E-07 | 0.225764336 | 0.202 | 0.078 | 0.00460559 |
| Cox17 | 3.72E-07 | 0.224355703 | 0.423 | 0.203 | 0.00476917 |
| Snx8 | 3.76E-07 | 0.220172477 | 0.147 | 0.051 | 0.00481786 |
| 2210016L21Rik | 3.90E-07 | 0.268119736 | 0.227 | 0.095 | 0.00500331 |
| Nipsnap3b | 3.97E-07 | 0.176714463 | 0.325 | 0.146 | 0.00509728 |
| Uxt | 4.01E-07 | 0.188376366 | 0.135 | 0.044 | 0.00514226 |
| Nsa2 | 4.11E-07 | 0.256379197 | 0.38 | 0.182 | 0.00527076 |
| Tpr | 4.11E-07 | 0.221358205 | 0.301 | 0.136 | 0.00527428 |
| Gm6133 | 4.16E-07 | 0.247974814 | 0.135 | 0.045 | 0.00533756 |
| Clip2 | 4.25E-07 | 0.333718609 | 0.123 | 0.04 | 0.00545285 |
| Mea1 | 4.32E-07 | 0.216869955 | 0.276 | 0.121 | 0.00554014 |
| Cd48 | 4.36E-07 | 0.293481516 | 0.546 | 0.299 | 0.00559726 |
| Ubl4a | 4.37E-07 | 0.17141986 | 0.227 | 0.092 | 0.00560134 |
| Tsc22d1 | 4.60E-07 | 0.271497126 | 0.153 | 0.054 | 0.00590263 |
| Dap3 | 4.69E-07 | 0.178476491 | 0.147 | 0.05 | 0.00601037 |
| Tctex1d2 | 4.81E-07 | 0.241964004 | 0.245 | 0.105 | 0.00616783 |
| Snrpd2 | 5.03E-07 | 0.295634005 | 0.528 | 0.284 | 0.0064505 |
| 2810428I15Rik | 5.19E-07 | 0.219727649 | 0.411 | 0.202 | 0.00665995 |
| Rps2 | 5.24E-07 | 0.163970358 | 0.896 | 0.803 | 0.00671779 |
| Adam17 | 5.77E-07 | 0.297255171 | 0.282 | 0.127 | 0.00740185 |
| Alkbh2 | 5.83E-07 | 0.156529998 | 0.104 | 0.03 | 0.00747513 |
| Txnl4a | 5.87E-07 | 0.180913069 | 0.233 | 0.096 | 0.0075301 |
| BC005537 | 5.88E-07 | 0.257053129 | 0.27 | 0.121 | 0.00754098 |
| Coq7 | 6.03E-07 | 0.172063415 | 0.135 | 0.045 | 0.00773974 |
| Colgalt1 | 6.07E-07 | 0.271658173 | 0.319 | 0.151 | 0.0077866 |
| Crat | 6.24E-07 | 0.240385108 | 0.215 | 0.088 | 0.00800258 |
| Tkt | 6.27E-07 | 0.27983882 | 0.503 | 0.265 | 0.00804181 |
| Tcp1 | 6.31E-07 | 0.258947425 | 0.393 | 0.197 | 0.00808686 |
| Glrx3 | 6.35E-07 | 0.283589982 | 0.405 | 0.204 | 0.0081499 |
| Fh1 | 6.39E-07 | 0.196499407 | 0.172 | 0.064 | 0.00819306 |
| 2700029M09Rik | 6.47E-07 | 0.231669858 | 0.307 | 0.141 | 0.00830148 |
| Igsf8 | 6.52E-07 | 0.214494832 | 0.288 | 0.129 | 0.00835897 |
| Zc3h13 | 6.57E-07 | 0.275214601 | 0.172 | 0.065 | 0.00842629 |
| Pfkl | 6.89E-07 | 0.295386345 | 0.301 | 0.143 | 0.00884152 |
| Pabpc1 | 6.96E-07 | 0.284738828 | 0.81 | 0.573 | 0.00892133 |
| Eprs | 7.19E-07 | 0.226183818 | 0.264 | 0.115 | 0.00922196 |
| Mif4gd | 7.19E-07 | 0.354044886 | 0.239 | 0.106 | 0.00922391 |
| Hspa9 | 7.37E-07 | 0.235830102 | 0.331 | 0.157 | 0.00945289 |
| Mrpl57 | 7.37E-07 | 0.22762371 | 0.288 | 0.131 | 0.00945914 |
| Gnb2l1 | 7.79E-07 | 0.256210997 | 0.84 | 0.622 | 0.00998584 |
| Mrpl51 | 7.92E-07 | 0.215685513 | 0.374 | 0.182 | 0.01015546 |
| Hsd17b12 | 8.06E-07 | 0.23033616 | 0.362 | 0.175 | 0.01033693 |
| Slirp | 8.13E-07 | 0.260457853 | 0.448 | 0.23 | 0.01042909 |
| Praf2 | 8.25E-07 | 0.198021008 | 0.117 | 0.037 | 0.01057913 |
| Ier3 | 8.39E-07 | 0.316962196 | 0.429 | 0.231 | 0.01076281 |
| Rb1 | 8.41E-07 | 0.216111384 | 0.129 | 0.043 | 0.0107839 |
| Mettl1 | 8.68E-07 | 0.210250009 | 0.19 | 0.075 | 0.01113617 |
| Gsap | 8.72E-07 | 0.220218695 | 0.178 | 0.069 | 0.01117806 |
| Ubxn1 | 8.75E-07 | 0.222547556 | 0.515 | 0.264 | 0.01121907 |
| Fam46c | 8.75E-07 | 0.267635441 | 0.245 | 0.107 | 0.01122143 |
| Becn1 | 8.76E-07 | 0.248054242 | 0.221 | 0.092 | 0.01123733 |
| Arl8a | 8.99E-07 | 0.24867969 | 0.288 | 0.133 | 0.01152509 |
| Ak6 | 1.04E-06 | 0.260887783 | 0.166 | 0.063 | 0.0133439 |
| Akr1a1 | 1.05E-06 | 0.25324285 | 0.791 | 0.591 | 0.01342963 |
| Sugt1 | 1.06E-06 | 0.219399263 | 0.344 | 0.164 | 0.01357297 |
| Gm17541 | 1.09E-06 | 0.136691582 | 0.104 | 0.031 | 0.01393987 |
| Scpep1 | 1.09E-06 | 0.209142194 | 0.221 | 0.092 | 0.01401734 |
| R3hdm2 | 1.11E-06 | 0.196823303 | 0.135 | 0.046 | 0.0142553 |
| Gm2a | 1.11E-06 | 0.275648965 | 0.65 | 0.376 | 0.01425576 |
| Tmem126a | 1.16E-06 | 0.190671701 | 0.245 | 0.106 | 0.01488144 |
| Gm26917 | 1.16E-06 | 0.283653049 | 0.337 | 0.167 | 0.0148884 |
| Furin | 1.18E-06 | 0.215787232 | 0.141 | 0.05 | 0.01515745 |
| Smim3 | 1.26E-06 | 0.206514299 | 0.209 | 0.086 | 0.01612184 |
| Glrx | 1.26E-06 | 0.1597628 | 0.184 | 0.072 | 0.01618364 |
| Eif4ebp1 | 1.36E-06 | 0.25323059 | 0.337 | 0.164 | 0.01739153 |
| Emc1 | 1.42E-06 | 0.274350563 | 0.129 | 0.044 | 0.01826767 |
| Eif3e | 1.58E-06 | 0.275935975 | 0.644 | 0.366 | 0.02022356 |
| Etf1 | 1.72E-06 | 0.226876048 | 0.239 | 0.105 | 0.02205579 |
| Sord | 1.74E-06 | 0.17186342 | 0.19 | 0.076 | 0.02231963 |
| Nrbf2 | 1.77E-06 | 0.208190595 | 0.227 | 0.098 | 0.0226943 |
| Iah1 | 1.86E-06 | 0.202563443 | 0.245 | 0.108 | 0.02387322 |
| Por | 1.89E-06 | 0.289915023 | 0.209 | 0.089 | 0.02429033 |
| Cks2 | 2.08E-06 | 0.185655814 | 0.153 | 0.057 | 0.02668044 |
| Ola1 | 2.10E-06 | 0.20332296 | 0.202 | 0.084 | 0.02696918 |
| Sh3bp2 | 2.13E-06 | 0.16608967 | 0.16 | 0.06 | 0.02729513 |
| Pde8b | 2.20E-06 | 0.174957134 | 0.129 | 0.044 | 0.02821746 |
| Plek | 2.25E-06 | 0.327859491 | 0.546 | 0.329 | 0.02888206 |
| Nudt4 | 2.31E-06 | 0.161481424 | 0.209 | 0.086 | 0.02968911 |
| Ube2l3 | 2.33E-06 | 0.268920694 | 0.472 | 0.256 | 0.02989446 |
| Hsd17b10 | 2.44E-06 | 0.211591505 | 0.301 | 0.142 | 0.03126651 |
| Sod2 | 2.50E-06 | 0.21535354 | 0.35 | 0.171 | 0.03203957 |
| Mesdc1 | 2.52E-06 | 0.250168543 | 0.117 | 0.038 | 0.03227778 |
| Iqcb1 | 2.54E-06 | 0.174260325 | 0.117 | 0.038 | 0.03252352 |
| Dnajc25 | 2.57E-06 | 0.202117346 | 0.16 | 0.061 | 0.03300536 |
| Adam9 | 2.60E-06 | 0.142028968 | 0.141 | 0.05 | 0.03338521 |
| Banf1 | 2.61E-06 | 0.170296863 | 0.288 | 0.13 | 0.03352921 |
| Cct8 | 2.64E-06 | 0.236835912 | 0.436 | 0.228 | 0.03384186 |
| Ccar1 | 2.68E-06 | 0.153707706 | 0.178 | 0.07 | 0.03431638 |
| Bnip3 | 2.74E-06 | 0.317345809 | 0.202 | 0.087 | 0.03514964 |
| Dnajc2 | 2.76E-06 | 0.21948641 | 0.227 | 0.1 | 0.03543497 |
| Eif5b | 2.81E-06 | 0.200537839 | 0.411 | 0.208 | 0.03607076 |
| Rnf128 | 2.84E-06 | 0.252255313 | 0.147 | 0.055 | 0.03641156 |
| Txnrd1 | 2.87E-06 | 0.186988391 | 0.153 | 0.058 | 0.03679196 |
| Sdf4 | 2.91E-06 | 0.275066619 | 0.693 | 0.418 | 0.03726507 |
| Fam129a | 3.00E-06 | 0.27580278 | 0.117 | 0.039 | 0.03845773 |
| Gde1 | 3.08E-06 | 0.204887949 | 0.393 | 0.198 | 0.03945933 |
| Tomm7 | 3.09E-06 | 0.264824951 | 0.607 | 0.352 | 0.03965348 |
| Paox | 3.10E-06 | 0.181338109 | 0.135 | 0.048 | 0.03977306 |
| Riok3 | 3.17E-06 | 0.155367768 | 0.196 | 0.081 | 0.04068425 |
| Amdhd2 | 3.18E-06 | 0.208382075 | 0.227 | 0.1 | 0.04079647 |
| Pitpna | 3.26E-06 | 0.21967732 | 0.423 | 0.217 | 0.04174888 |
| Atp6v1d | 3.37E-06 | 0.240883711 | 0.393 | 0.202 | 0.04325745 |
| Plekhb2 | 3.43E-06 | 0.248292609 | 0.215 | 0.094 | 0.04401131 |
| Agpat2 | 3.52E-06 | 0.164107529 | 0.202 | 0.085 | 0.04509602 |
| Pdcd6ip | 3.54E-06 | 0.154545327 | 0.258 | 0.116 | 0.04541721 |
| Higd1a | 3.55E-06 | 0.229992913 | 0.356 | 0.18 | 0.04551208 |
| Ppp1r15a | 3.84E-06 | 0.210134507 | 0.368 | 0.188 | 0.04921443 |

DEGs, differentially expressed genes.
